# Supplementary material
Source: publisher figshare collection journal article supplement (https://gsajournals.figshare.com/ndownloader/files/21518919)
Supplement: Supplementary file 1 [file 21518919]

**Table S2.** Candidate alternative splicing in F02.

| QueryName | SubjectName | QhspStart1 | QhspEnd1 | QhspStart2 | QhspEnd2 | ShspStart1 | ShspEnd1 | ShspStart2 | ShspEnd2 |
| --- | --- | --- | --- | --- | --- | --- | --- | --- | --- |
| F02.PB28975 | F02.PB29371 | 323 | 2042 | 81 | 323 | 388 | 2109 | 1 | 243 |
| F02.PB31557 | F02.PB37489 | 1244 | 2535 | 1 | 1244 | 1751 | 3049 | 328 | 1556 |
| F02.PB28908 | F02.PB31973 | 1 | 1484 | 1483 | 2677 | 4 | 1487 | 1782 | 2976 |
| F02.PB36236 | F02.PB37212 | 304 | 3372 | 1 | 307 | 540 | 3611 | 112 | 418 |
| F02.PB40415 | F02.PB34923 | 179 | 3178 | 1 | 184 | 965 | 3964 | 12 | 193 |
| F02.PB13735 | F02.PB44309 | 263 | 1624 | 42 | 264 | 791 | 2155 | 10 | 232 |
| F02.PB39705 | F02.PB35849 | 1 | 2177 | 2175 | 3092 | 31 | 2206 | 2313 | 3231 |
| F02.PB26187 | F02.PB33236 | 320 | 2457 | 39 | 325 | 430 | 2554 | 26 | 313 |
| F02.PB7611 | F02.PB45746 | 1 | 1211 | 1208 | 1659 | 1 | 1212 | 1347 | 1799 |
| F02.PB16633 | F02.PB8961 | 144 | 1211 | 25 | 147 | 528 | 1591 | 1 | 123 |
| F02.PB27249 | F02.PB26615 | 1 | 1220 | 1219 | 2040 | 4 | 1223 | 1325 | 2146 |
| F02.PB32881 | F02.PB33786 | 1 | 2380 | 2377 | 2769 | 2 | 2381 | 2494 | 2886 |
| F02.PB37789 | F02.PB37418 | 153 | 3022 | 1 | 157 | 292 | 3171 | 12 | 168 |
| F02.PB31863 | F02.PB39894 | 1 | 1466 | 1466 | 2924 | 1 | 1466 | 1931 | 3389 |
| F02.PB38191 | F02.PB47900 | 1 | 1988 | 1988 | 3260 | 1690 | 3679 | 2486 | 3757 |
| F02.PB30479 | F02.PB34649 | 1 | 1168 | 1167 | 2094 | 1 | 1167 | 1373 | 2300 |
| F02.PB24856 | F02.PB29199 | 12 | 1828 | 1827 | 2172 | 7 | 1838 | 2325 | 2668 |
| F02.PB48621 | F02.PB48358 | 1 | 2650 | 2650 | 2979 | 322 | 2971 | 3074 | 3403 |
| F02.PB33134 | F02.PB34132 | 1 | 2094 | 2093 | 2291 | 1 | 2114 | 2296 | 2500 |
| F02.PB35877 | F02.PB35915 | 1 | 2091 | 2088 | 3179 | 1 | 2094 | 2322 | 3414 |
| F02.PB8972 | F02.PB45853 | 1 | 1494 | 1495 | 1697 | 12 | 1505 | 1888 | 2090 |
| F02.PB42737 | F02.PB27397 | 1 | 1270 | 1274 | 1598 | 1 | 1248 | 1820 | 2144 |
| F02.PB17581 | F02.PB38940 | 147 | 1979 | 1 | 143 | 1833 | 3668 | 1566 | 1709 |
| F02.PB48045 | F02.PB38330 | 1 | 3258 | 3258 | 3947 | 223 | 3480 | 3379 | 4069 |
| F02.PB18418 | F02.PB38778 | 543 | 1577 | 7 | 547 | 2481 | 3515 | 1 | 543 |
| F02.PB23230 | F02.PB31948 | 163 | 2232 | 1 | 164 | 286 | 2352 | 1 | 158 |
| F02.PB46228 | F02.PB34183 | 1 | 2710 | 2708 | 2810 | 40 | 2748 | 2857 | 2959 |
| F02.PB34239 | F02.PB36964 | 1 | 1948 | 1944 | 2960 | 150 | 2097 | 2289 | 3316 |
| F02.PB38863 | F02.PB38739 | 2 | 2893 | 2892 | 3063 | 103 | 2986 | 3142 | 3308 |
| F02.PB21583 | F02.PB26555 | 118 | 1938 | 1 | 118 | 292 | 2097 | 38 | 155 |
| F02.PB39636 | F02.PB36883 | 272 | 3056 | 1 | 274 | 515 | 3301 | 65 | 336 |
| F02.PB36901 | F02.PB40372 | 1 | 1728 | 1729 | 2942 | 26 | 1753 | 1860 | 3077 |
| F02.PB29335 | F02.PB24197 | 1 | 1747 | 1744 | 2186 | 5 | 1750 | 2308 | 2750 |
| F02.PB46197 | F02.PB47064 | 578 | 2962 | 8 | 579 | 839 | 3223 | 1 | 572 |
| F02.PB40415 | F02.PB39789 | 179 | 3228 | 1 | 184 | 878 | 3927 | 6 | 188 |
| F02.PB10828 | F02.PB16474 | 234 | 1377 | 42 | 235 | 454 | 1601 | 1 | 199 |
| F02.PB34258 | F02.PB40669 | 1 | 2097 | 2097 | 2980 | 2 | 2112 | 2238 | 3133 |
| F02.PB31473 | F02.PB32104 | 1 | 1410 | 1405 | 2079 | 606 | 2019 | 2189 | 2863 |
| F02.PB48205 | F02.PB40596 | 14 | 1764 | 1759 | 3047 | 93 | 1845 | 2007 | 3295 |
| F02.PB18806 | F02.PB31727 | 501 | 1996 | 73 | 504 | 621 | 2116 | 1 | 432 |
| F02.PB47211 | F02.PB36673 | 1 | 1739 | 1740 | 3016 | 1871 | 3609 | 2531 | 3807 |
| F02.PB42041 | F02.PB30441 | 334 | 1486 | 47 | 335 | 1118 | 2269 | 2 | 290 |
| F02.PB41281 | F02.PB38000 | 750 | 3106 | 84 | 755 | 821 | 3177 | 1 | 672 |
| F02.PB18878 | F02.PB9088 | 110 | 1151 | 1 | 111 | 262 | 1295 | 34 | 144 |
| F02.PB45878 | F02.PB36077 | 1 | 2457 | 2456 | 2833 | 270 | 2726 | 2836 | 3213 |
| F02.PB9949 | F02.PB46050 | 255 | 981 | 1 | 256 | 1827 | 2556 | 1260 | 1515 |
| F02.PB48576 | F02.PB39775 | 866 | 3453 | 9 | 868 | 1330 | 3918 | 348 | 1207 |
| F02.PB9519 | F02.PB28810 | 482 | 1515 | 7 | 483 | 1116 | 2152 | 1 | 443 |
| F02.PB39749 | F02.PB35206 | 1 | 2119 | 2119 | 3208 | 42 | 2157 | 2391 | 3480 |
| F02.PB22396 | F02.PB8325 | 1 | 1198 | 1198 | 1423 | 1 | 1200 | 1323 | 1548 |
| F02.PB31557 | F02.PB40309 | 1243 | 2539 | 1 | 1244 | 1798 | 3094 | 270 | 1497 |
| F02.PB11830 | F02.PB17856 | 216 | 1050 | 7 | 215 | 478 | 1308 | 6 | 214 |
| F02.PB14019 | F02.PB21997 | 185 | 1477 | 27 | 181 | 581 | 1877 | 327 | 481 |
| F02.PB47211 | F02.PB40565 | 1 | 1739 | 1740 | 3016 | 1874 | 3612 | 2534 | 3810 |
| F02.PB34917 | F02.PB47549 | 145 | 3131 | 1 | 146 | 297 | 3283 | 1 | 146 |
| F02.PB47211 | F02.PB47261 | 1 | 1739 | 1740 | 3016 | 1745 | 3483 | 2405 | 3681 |
| F02.PB36756 | F02.PB38794 | 102 | 3169 | 1 | 101 | 256 | 3324 | 44 | 144 |
| F02.PB32533 | F02.PB34524 | 107 | 1446 | 1447 | 2702 | 1 | 1343 | 1460 | 2713 |
| F02.PB35071 | F02.PB35849 | 17 | 2223 | 2221 | 3100 | 1 | 2206 | 2313 | 3193 |
| F02.PB27453 | F02.PB38139 | 1 | 2006 | 2005 | 2976 | 5 | 2010 | 2256 | 3246 |
| F02.PB27681 | F02.PB22962 | 1 | 1994 | 1993 | 2208 | 10 | 2000 | 2145 | 2360 |
| F02.PB28788 | F02.PB33500 | 1 | 1757 | 1757 | 2031 | 429 | 2183 | 2372 | 2646 |
| F02.PB33571 | F02.PB47867 | 1 | 2041 | 2041 | 2308 | 495 | 2535 | 2640 | 2907 |
| F02.PB15459 | F02.PB25755 | 1 | 1254 | 1251 | 1672 | 8 | 1261 | 2140 | 2561 |
| F02.PB34442 | F02.PB32087 | 109 | 1663 | 1661 | 2515 | 1 | 1556 | 2046 | 2901 |
| F02.PB26766 | F02.PB32697 | 1153 | 2406 | 1 | 1155 | 1720 | 2975 | 3 | 1157 |
| F02.PB40507 | F02.PB38659 | 220 | 3088 | 1 | 224 | 810 | 3676 | 298 | 521 |
| F02.PB30274 | F02.PB37967 | 1 | 1750 | 1747 | 2362 | 302 | 2050 | 2169 | 2779 |
| F02.PB42873 | F02.PB30173 | 1 | 1395 | 1391 | 1667 | 1 | 1382 | 1794 | 2058 |
| F02.PB31383 | F02.PB33053 | 1 | 1404 | 1401 | 2586 | 159 | 1570 | 1687 | 2873 |
| F02.PB25873 | F02.PB38455 | 1 | 1833 | 1837 | 2495 | 55 | 1888 | 2300 | 2959 |
| F02.PB29351 | F02.PB41045 | 14 | 1711 | 1711 | 2115 | 248 | 1944 | 2079 | 2483 |
| F02.PB18360 | F02.PB29112 | 1 | 1547 | 1545 | 1893 | 1 | 1543 | 1846 | 2194 |
| F02.PB31001 | F02.PB26494 | 1 | 1287 | 1283 | 2400 | 1 | 1290 | 1619 | 2735 |
| F02.PB36457 | F02.PB37068 | 216 | 3093 | 15 | 221 | 802 | 3679 | 16 | 223 |
| F02.PB35884 | F02.PB48269 | 155 | 2031 | 2029 | 3266 | 1 | 1877 | 2061 | 3300 |
| F02.PB39693 | F02.PB41027 | 1 | 2581 | 2582 | 3232 | 1 | 2604 | 2708 | 3356 |
| F02.PB23569 | F02.PB37017 | 635 | 2394 | 82 | 634 | 1237 | 2996 | 243 | 795 |
| F02.PB8187 | F02.PB14201 | 98 | 1267 | 1 | 100 | 347 | 1515 | 60 | 159 |
| F02.PB30806 | F02.PB36822 | 284 | 2287 | 34 | 287 | 1844 | 3844 | 1 | 254 |
| F02.PB34255 | F02.PB24492 | 113 | 2092 | 1 | 114 | 350 | 2330 | 48 | 161 |
| F02.PB37355 | F02.PB48368 | 1576 | 3139 | 1 | 1573 | 1685 | 3251 | 9 | 1579 |
| F02.PB38076 | F02.PB38351 | 343 | 3278 | 46 | 347 | 865 | 3801 | 51 | 352 |
| F02.PB23544 | F02.PB45349 | 1 | 1730 | 1730 | 2260 | 1 | 1735 | 1878 | 2408 |
| F02.PB39636 | F02.PB41302 | 272 | 3048 | 1 | 274 | 453 | 3231 | 1 | 274 |
| F02.PB41508 | F02.PB36311 | 1330 | 3008 | 1 | 1331 | 1449 | 3118 | 7 | 1330 |
| F02.PB28518 | F02.PB36144 | 558 | 2195 | 6 | 557 | 1614 | 3250 | 1 | 554 |
| F02.PB41432 | F02.PB47269 | 111 | 2078 | 2075 | 3207 | 20 | 1987 | 2228 | 3360 |
| F02.PB23761 | F02.PB46204 | 840 | 2287 | 9 | 840 | 1486 | 2939 | 1 | 832 |
| F02.PB40707 | F02.PB39030 | 1 | 1852 | 1853 | 3342 | 51 | 1901 | 2001 | 3489 |
| F02.PB39375 | F02.PB38163 | 567 | 3091 | 58 | 566 | 689 | 3209 | 1 | 502 |
| F02.PB24043 | F02.PB24239 | 1 | 1877 | 1878 | 2561 | 16 | 1889 | 2004 | 2685 |
| F02.PB17848 | F02.PB45240 | 339 | 1080 | 6 | 340 | 1463 | 2215 | 740 | 1079 |
| F02.PB31080 | F02.PB25503 | 1 | 2023 | 2022 | 2286 | 1 | 2023 | 2127 | 2392 |
| F02.PB33536 | F02.PB40702 | 1134 | 2985 | 1 | 1130 | 1494 | 3328 | 224 | 1371 |
| F02.PB26443 | F02.PB36275 | 1 | 1994 | 1992 | 2817 | 112 | 2115 | 2237 | 3066 |
| F02.PB20223 | F02.PB13598 | 479 | 1294 | 8 | 484 | 899 | 1714 | 1 | 477 |
| F02.PB32446 | F02.PB46147 | 1 | 1644 | 1643 | 2322 | 191 | 1837 | 2062 | 2741 |
| F02.PB45317 | F02.PB46134 | 13 | 1581 | 1578 | 2308 | 1 | 1569 | 1945 | 2675 |
| F02.PB35680 | F02.PB47207 | 1250 | 2867 | 1 | 1250 | 1615 | 3231 | 1 | 1251 |
| F02.PB31687 | F02.PB26829 | 110 | 2068 | 11 | 110 | 203 | 2161 | 1 | 100 |
| F02.PB34128 | F02.PB47261 | 211 | 2753 | 1 | 208 | 1135 | 3677 | 22 | 224 |
| F02.PB35829 | F02.PB48163 | 129 | 2483 | 2483 | 3083 | 40 | 2385 | 2492 | 3092 |
| F02.PB41313 | F02.PB36382 | 1011 | 3269 | 1 | 1012 | 1177 | 3435 | 41 | 1052 |
| F02.PB37999 | F02.PB48250 | 1238 | 3339 | 1 | 1237 | 1370 | 3471 | 1 | 1238 |
| F02.PB23532 | F02.PB36263 | 1 | 1729 | 1730 | 2839 | 3 | 1731 | 2164 | 3270 |
| F02.PB38689 | F02.PB39387 | 583 | 3006 | 87 | 584 | 630 | 3052 | 22 | 518 |
| F02.PB22919 | F02.PB44408 | 378 | 2378 | 8 | 380 | 605 | 2604 | 64 | 432 |
| F02.PB33017 | F02.PB46930 | 175 | 2977 | 1 | 178 | 475 | 3273 | 164 | 342 |
| F02.PB33174 | F02.PB23550 | 224 | 2232 | 1 | 223 | 722 | 2734 | 391 | 613 |
| F02.PB28635 | F02.PB24669 | 131 | 2049 | 1 | 135 | 397 | 2315 | 70 | 204 |
| F02.PB34274 | F02.PB40781 | 1 | 1967 | 1966 | 2888 | 5 | 1972 | 2080 | 3001 |
| F02.PB33036 | F02.PB34669 | 19 | 1917 | 1913 | 2224 | 46 | 1940 | 2067 | 2375 |
| F02.PB34046 | F02.PB47737 | 1187 | 2824 | 1 | 1188 | 1642 | 3270 | 349 | 1533 |
| F02.PB36678 | F02.PB38390 | 1111 | 2976 | 1 | 1113 | 1281 | 3159 | 16 | 1146 |
| F02.PB37247 | F02.PB40439 | 1 | 3015 | 3015 | 3490 | 51 | 3065 | 3269 | 3739 |
| F02.PB47173 | F02.PB40532 | 151 | 3041 | 1 | 153 | 875 | 3765 | 24 | 176 |
| F02.PB43796 | F02.PB38382 | 1 | 1520 | 1517 | 1900 | 1435 | 2953 | 3074 | 3456 |
| F02.PB34345 | F02.PB40220 | 1 | 2496 | 2491 | 2616 | 1 | 2473 | 3170 | 3294 |
| F02.PB38677 | F02.PB39059 | 1374 | 3297 | 1 | 1373 | 1504 | 3430 | 1 | 1389 |
| F02.PB19160 | F02.PB26615 | 1 | 1111 | 1110 | 1954 | 105 | 1223 | 1325 | 2185 |
| F02.PB16550 | F02.PB23154 | 133 | 1445 | 1 | 137 | 1340 | 2652 | 54 | 190 |
| F02.PB23780 | F02.PB48344 | 1 | 1306 | 1303 | 2532 | 59 | 1363 | 1565 | 2795 |
| F02.PB24120 | F02.PB40419 | 1 | 1884 | 1888 | 2054 | 724 | 2619 | 3028 | 3193 |
| F02.PB33646 | F02.PB26494 | 118 | 1380 | 1381 | 2371 | 1 | 1263 | 1624 | 2614 |
| F02.PB38883 | F02.PB36226 | 1350 | 3129 | 1 | 1346 | 1883 | 3662 | 433 | 1778 |
| F02.PB45635 | F02.PB41410 | 218 | 2920 | 1 | 223 | 504 | 3206 | 19 | 241 |
| F02.PB27793 | F02.PB32515 | 195 | 2428 | 13 | 197 | 638 | 2873 | 35 | 218 |
| F02.PB36457 | F02.PB41422 | 216 | 3093 | 15 | 221 | 837 | 3713 | 116 | 322 |
| F02.PB20716 | F02.PB29033 | 288 | 1897 | 36 | 290 | 398 | 2008 | 1 | 255 |
| F02.PB22963 | F02.PB45808 | 461 | 2622 | 74 | 460 | 728 | 2889 | 1 | 387 |
| F02.PB32282 | F02.PB38619 | 365 | 2836 | 8 | 368 | 704 | 3177 | 1 | 373 |
| F02.PB40640 | F02.PB37645 | 1 | 2796 | 2794 | 3051 | 804 | 3599 | 3878 | 4135 |
| F02.PB39180 | F02.PB48737 | 655 | 3168 | 92 | 653 | 708 | 3221 | 1 | 562 |
| F02.PB32852 | F02.PB34497 | 121 | 2538 | 1 | 124 | 541 | 2958 | 60 | 183 |
| F02.PB38139 | F02.PB37296 | 1153 | 3251 | 1 | 1152 | 1455 | 3566 | 1 | 1165 |
| F02.PB38469 | F02.PB37068 | 215 | 3096 | 14 | 220 | 802 | 3684 | 16 | 223 |
| F02.PB37651 | F02.PB35574 | 1 | 2255 | 2252 | 3270 | 57 | 2311 | 2504 | 3521 |
| F02.PB24043 | F02.PB32191 | 12 | 1877 | 1878 | 2561 | 27 | 1891 | 2006 | 2684 |
| F02.PB40801 | F02.PB38932 | 269 | 3283 | 1 | 273 | 937 | 3948 | 223 | 494 |
| F02.PB20186 | F02.PB43895 | 123 | 1655 | 1 | 125 | 311 | 1842 | 10 | 134 |
| F02.PB32453 | F02.PB28546 | 1 | 1670 | 1665 | 2248 | 24 | 1685 | 1850 | 2430 |
| F02.PB48425 | F02.PB40555 | 1 | 3113 | 3114 | 3633 | 12 | 3124 | 3244 | 3763 |
| F02.PB25799 | F02.PB26456 | 1 | 1399 | 1394 | 2315 | 4 | 1402 | 1645 | 2566 |
| F02.PB31432 | F02.PB39031 | 103 | 2594 | 2593 | 2912 | 1 | 2492 | 2796 | 3115 |
| F02.PB34885 | F02.PB36249 | 12 | 2480 | 2478 | 3277 | 1 | 2481 | 2582 | 3380 |
| F02.PB5380 | F02.PB29618 | 167 | 1738 | 1 | 166 | 561 | 2131 | 1 | 166 |
| F02.PB5921 | F02.PB31493 | 1 | 1296 | 1296 | 1525 | 501 | 1797 | 1897 | 2135 |
| F02.PB32895 | F02.PB46309 | 1 | 1071 | 1071 | 2002 | 40 | 1109 | 2647 | 3577 |
| F02.PB37702 | F02.PB48009 | 1479 | 3137 | 1 | 1484 | 1599 | 3261 | 13 | 1493 |
| F02.PB38308 | F02.PB47261 | 1 | 2287 | 2283 | 3670 | 1403 | 3690 | 2391 | 3778 |
| F02.PB30103 | F02.PB31792 | 1 | 1614 | 1612 | 2784 | 1 | 1612 | 1733 | 2916 |
| F02.PB32793 | F02.PB31937 | 103 | 1955 | 1952 | 2640 | 85 | 1937 | 2261 | 2947 |
| F02.PB11363 | F02.PB45859 | 118 | 1299 | 1 | 118 | 926 | 2107 | 46 | 163 |
| F02.PB44070 | F02.PB33646 | 1 | 1042 | 1043 | 2088 | 114 | 1155 | 1326 | 2371 |
| F02.PB7340 | F02.PB43554 | 391 | 1136 | 7 | 390 | 501 | 1246 | 1 | 384 |
| F02.PB32793 | F02.PB39937 | 101 | 2640 | 1 | 101 | 468 | 3003 | 111 | 211 |
| F02.PB20191 | F02.PB18230 | 421 | 985 | 1 | 426 | 588 | 1154 | 1 | 429 |
| F02.PB37422 | F02.PB39059 | 1480 | 3406 | 100 | 1479 | 1504 | 3430 | 1 | 1389 |
| F02.PB38191 | F02.PB39315 | 1 | 1988 | 1988 | 3326 | 1524 | 3501 | 2317 | 3644 |
| F02.PB36864 | F02.PB35315 | 22 | 2478 | 2478 | 3506 | 5 | 2455 | 2838 | 3869 |
| F02.PB22099 | F02.PB44544 | 201 | 1862 | 32 | 202 | 393 | 2066 | 1 | 164 |
| F02.PB29145 | F02.PB29878 | 190 | 2423 | 11 | 191 | 525 | 2755 | 211 | 393 |
| F02.PB41508 | F02.PB37426 | 1 | 1822 | 1820 | 2981 | 10 | 1831 | 2068 | 3220 |
| F02.PB35193 | F02.PB38193 | 1 | 1923 | 1923 | 3184 | 26 | 1947 | 2051 | 3312 |
| F02.PB34905 | F02.PB39920 | 13 | 3165 | 3164 | 3510 | 1 | 3153 | 3553 | 3899 |
| F02.PB45173 | F02.PB44250 | 15 | 1735 | 1735 | 2101 | 17 | 1737 | 1939 | 2305 |
| F02.PB11760 | F02.PB28216 | 1 | 1021 | 1019 | 1346 | 410 | 1430 | 1699 | 2028 |
| F02.PB47967 | F02.PB48545 | 1 | 3057 | 3057 | 3287 | 9 | 3066 | 3251 | 3482 |
| F02.PB38682 | F02.PB40574 | 1481 | 3257 | 1 | 1477 | 1611 | 3382 | 1 | 1475 |
| F02.PB40522 | F02.PB40645 | 462 | 3654 | 71 | 462 | 518 | 3698 | 18 | 409 |
| F02.PB25104 | F02.PB28404 | 136 | 2285 | 1 | 136 | 660 | 2807 | 19 | 151 |
| F02.PB33793 | F02.PB48556 | 1 | 2017 | 2014 | 2923 | 3 | 2024 | 2132 | 3041 |
| F02.PB37843 | F02.PB37434 | 1389 | 3361 | 109 | 1391 | 1459 | 3437 | 1 | 1283 |
| F02.PB29810 | F02.PB28961 | 1 | 1722 | 1722 | 1959 | 1 | 1722 | 1878 | 2115 |
| F02.PB24774 | F02.PB45252 | 1 | 1342 | 1341 | 2242 | 6 | 1341 | 1455 | 2356 |
| F02.PB31048 | F02.PB44599 | 1118 | 2463 | 1 | 1120 | 1272 | 2617 | 24 | 1159 |
| F02.PB28005 | F02.PB33995 | 1 | 1806 | 1806 | 2017 | 640 | 2445 | 2728 | 2940 |
| F02.PB47881 | F02.PB47261 | 1 | 2961 | 2961 | 3240 | 8 | 2963 | 3342 | 3621 |
| F02.PB30548 | F02.PB32764 | 262 | 2553 | 34 | 267 | 645 | 2979 | 218 | 456 |
| F02.PB43302 | F02.PB31241 | 392 | 1309 | 4 | 391 | 1543 | 2455 | 1029 | 1411 |
| F02.PB17703 | F02.PB31042 | 108 | 1964 | 1 | 107 | 232 | 2089 | 1 | 105 |
| F02.PB23337 | F02.PB46025 | 15 | 1733 | 1732 | 2266 | 1 | 1716 | 2240 | 2774 |
| F02.PB45878 | F02.PB35593 | 1 | 2457 | 2456 | 2712 | 288 | 2744 | 2855 | 3110 |
| F02.PB21965 | F02.PB17570 | 315 | 1620 | 54 | 316 | 538 | 1843 | 31 | 293 |
| F02.PB33919 | F02.PB38744 | 120 | 2791 | 1 | 122 | 371 | 3041 | 49 | 170 |
| F02.PB38246 | F02.PB39519 | 1 | 2686 | 2684 | 3815 | 58 | 2744 | 2854 | 3985 |
| F02.PB41327 | F02.PB39763 | 280 | 3180 | 1 | 281 | 490 | 3404 | 43 | 323 |
| F02.PB20278 | F02.PB22712 | 198 | 1046 | 26 | 201 | 809 | 1657 | 34 | 209 |
| F02.PB44437 | F02.PB33300 | 406 | 2021 | 7 | 406 | 1402 | 2997 | 863 | 1259 |
| F02.PB47211 | F02.PB47900 | 1 | 1739 | 1740 | 3010 | 1827 | 3565 | 2487 | 3757 |
| F02.PB31001 | F02.PB39463 | 1 | 1287 | 1283 | 2291 | 695 | 1984 | 2307 | 3313 |
| F02.PB23710 | F02.PB47167 | 202 | 2527 | 1 | 204 | 534 | 2857 | 1 | 204 |
| F02.PB34771 | F02.PB36272 | 703 | 3035 | 91 | 703 | 745 | 3078 | 20 | 633 |
| F02.PB32395 | F02.PB23775 | 107 | 2142 | 1 | 105 | 401 | 2435 | 44 | 148 |
| F02.PB35012 | F02.PB36787 | 100 | 2941 | 2940 | 3738 | 1 | 2842 | 2951 | 3747 |
| F02.PB40888 | F02.PB41127 | 1 | 1956 | 1956 | 3365 | 492 | 2466 | 2568 | 3981 |
| F02.PB36120 | F02.PB38192 | 1 | 1983 | 1983 | 3114 | 30 | 2014 | 2180 | 3317 |
| F02.PB38469 | F02.PB41364 | 215 | 3096 | 14 | 220 | 841 | 3723 | 112 | 326 |
| F02.PB32511 | F02.PB45169 | 1 | 1263 | 1263 | 2150 | 2 | 1264 | 1573 | 2468 |
| F02.PB8052 | F02.PB19022 | 1 | 1004 | 1005 | 1415 | 1 | 1003 | 1127 | 1538 |
| F02.PB34601 | F02.PB37156 | 127 | 2803 | 1 | 126 | 360 | 3035 | 116 | 241 |
| F02.PB43302 | F02.PB45041 | 390 | 1309 | 4 | 393 | 1614 | 2533 | 1061 | 1450 |
| F02.PB37574 | F02.PB36621 | 458 | 3204 | 88 | 457 | 510 | 3246 | 31 | 400 |
| F02.PB44246 | F02.PB38410 | 14 | 2079 | 2076 | 2431 | 85 | 2156 | 2349 | 2705 |
| F02.PB29049 | F02.PB28518 | 1 | 1301 | 1305 | 2084 | 6 | 1304 | 1417 | 2196 |
| F02.PB26017 | F02.PB40032 | 1 | 1276 | 1278 | 2255 | 372 | 1647 | 1943 | 2920 |
| F02.PB22919 | F02.PB30027 | 787 | 2379 | 8 | 791 | 1013 | 2601 | 8 | 786 |
| F02.PB40474 | F02.PB39959 | 1 | 1972 | 1969 | 3201 | 13 | 1974 | 2376 | 3609 |
| F02.PB11369 | F02.PB46576 | 1137 | 106 | 755 | 1137 | 2390 | 3422 | 1696 | 2080 |
| F02.PB31557 | F02.PB37424 | 1 | 1548 | 1548 | 2539 | 306 | 1838 | 2112 | 3103 |
| F02.PB29351 | F02.PB36929 | 1 | 1711 | 1711 | 2115 | 184 | 1895 | 2030 | 2434 |
| F02.PB42210 | F02.PB21566 | 1 | 1173 | 1170 | 1644 | 122 | 1294 | 1395 | 1869 |
| F02.PB21463 | F02.PB27632 | 155 | 1949 | 1 | 150 | 385 | 2185 | 68 | 217 |
| F02.PB47621 | F02.PB47256 | 1 | 1665 | 1662 | 3018 | 153 | 1817 | 2007 | 3363 |
| F02.PB33840 | F02.PB46953 | 1 | 1525 | 1524 | 2976 | 1 | 1524 | 1628 | 3095 |
| F02.PB21857 | F02.PB44427 | 1 | 1504 | 1503 | 1926 | 35 | 1538 | 1933 | 2356 |
| F02.PB47701 | F02.PB34839 | 1 | 3178 | 3177 | 3460 | 53 | 3223 | 3331 | 3614 |
| F02.PB35109 | F02.PB36306 | 1238 | 2915 | 1 | 1234 | 1372 | 3042 | 24 | 1259 |
| F02.PB38875 | F02.PB47269 | 18 | 1985 | 1982 | 3114 | 20 | 1987 | 2228 | 3360 |
| F02.PB46183 | F02.PB40313 | 1 | 2039 | 2040 | 2812 | 1097 | 3133 | 3375 | 4147 |
| F02.PB46941 | F02.PB40509 | 2 | 2786 | 2787 | 3346 | 1 | 2785 | 3285 | 3844 |
| F02.PB34099 | F02.PB47999 | 258 | 2927 | 1 | 256 | 372 | 3045 | 1 | 256 |
| F02.PB27684 | F02.PB44242 | 1 | 1719 | 1718 | 2217 | 2 | 1718 | 1819 | 2318 |
| F02.PB45695 | F02.PB44601 | 1 | 1502 | 1503 | 2011 | 57 | 1558 | 1692 | 2200 |
| F02.PB34735 | F02.PB48626 | 108 | 2672 | 2673 | 3155 | 1 | 2566 | 2689 | 3172 |
| F02.PB38229 | F02.PB35960 | 1 | 1970 | 1971 | 3600 | 18 | 1987 | 2096 | 3730 |
| F02.PB38941 | F02.PB37074 | 1 | 2595 | 2594 | 3186 | 1 | 2593 | 2701 | 3281 |
| F02.PB39064 | F02.PB47704 | 1 | 2109 | 2106 | 3145 | 1 | 2104 | 2323 | 3362 |
| F02.PB47621 | F02.PB35316 | 1 | 1665 | 1663 | 3018 | 7 | 1671 | 1775 | 3132 |
| F02.PB32450 | F02.PB39534 | 1 | 2158 | 2157 | 2707 | 1 | 2161 | 2513 | 3064 |
| F02.PB30915 | F02.PB31090 | 337 | 2000 | 8 | 337 | 760 | 2421 | 1 | 331 |
| F02.PB40505 | F02.PB40962 | 1198 | 3196 | 1 | 1198 | 1438 | 3423 | 32 | 1229 |
| F02.PB28947 | F02.PB29263 | 1 | 1649 | 1644 | 2156 | 129 | 1769 | 1936 | 2448 |
| F02.PB47211 | F02.PB39455 | 1 | 1739 | 1740 | 3016 | 1019 | 2757 | 1679 | 2955 |
| F02.PB39956 | F02.PB41481 | 1 | 2059 | 2054 | 3210 | 106 | 2165 | 2301 | 3456 |
| F02.PB46081 | F02.PB37121 | 1 | 2415 | 2418 | 2878 | 599 | 3013 | 3114 | 3574 |
| F02.PB33526 | F02.PB24849 | 1 | 1397 | 1396 | 2056 | 208 | 1605 | 1752 | 2413 |
| F02.PB38062 | F02.PB37583 | 2 | 3146 | 3146 | 3371 | 1 | 3130 | 3234 | 3460 |
| F02.PB48546 | F02.PB39890 | 23 | 2449 | 2451 | 3297 | 3 | 2429 | 2563 | 3393 |
| F02.PB5968 | F02.PB27739 | 10 | 1428 | 1426 | 1734 | 1 | 1419 | 1576 | 1883 |
| F02.PB47211 | F02.PB39315 | 1 | 1739 | 1740 | 3016 | 1660 | 3390 | 2318 | 3585 |
| F02.PB22941 | F02.PB44165 | 129 | 2080 | 1 | 130 | 550 | 2501 | 3 | 132 |
| F02.PB38076 | F02.PB37576 | 343 | 3278 | 62 | 347 | 799 | 3735 | 1 | 286 |
| F02.PB37819 | F02.PB35529 | 478 | 3709 | 5 | 479 | 650 | 3889 | 6 | 488 |
| F02.PB26411 | F02.PB26850 | 417 | 2264 | 52 | 416 | 545 | 2393 | 1 | 365 |
| F02.PB20232 | F02.PB25890 | 1 | 1336 | 1336 | 1958 | 1 | 1336 | 1447 | 2069 |
| F02.PB47719 | F02.PB37876 | 1018 | 3189 | 1 | 1019 | 1153 | 3325 | 1 | 1019 |
| F02.PB36457 | F02.PB41433 | 216 | 3093 | 15 | 221 | 835 | 3712 | 114 | 320 |
| F02.PB48778 | F02.PB37776 | 1 | 2075 | 2076 | 3400 | 3 | 2077 | 2204 | 3529 |
| F02.PB24350 | F02.PB24849 | 1 | 1510 | 1509 | 2148 | 94 | 1605 | 1752 | 2391 |
| F02.PB24329 | F02.PB33591 | 1 | 2008 | 2003 | 2220 | 52 | 2057 | 2344 | 2561 |
| F02.PB15612 | F02.PB39845 | 1 | 1324 | 1322 | 1659 | 1 | 1324 | 2746 | 3083 |
| F02.PB40709 | F02.PB37212 | 233 | 3286 | 1 | 236 | 540 | 3598 | 178 | 418 |
| F02.PB47083 | F02.PB40062 | 107 | 3172 | 1 | 111 | 826 | 3891 | 27 | 138 |
| F02.PB21942 | F02.PB45421 | 398 | 1959 | 60 | 399 | 757 | 2322 | 64 | 404 |
| F02.PB38607 | F02.PB40465 | 102 | 3749 | 1 | 105 | 221 | 3868 | 4 | 108 |
| F02.PB22440 | F02.PB28362 | 261 | 1553 | 37 | 264 | 840 | 2132 | 1 | 228 |
| F02.PB44237 | F02.PB31667 | 12 | 1563 | 1566 | 2122 | 1 | 1552 | 1656 | 2212 |
| F02.PB45635 | F02.PB41378 | 218 | 2920 | 1 | 223 | 561 | 3263 | 90 | 312 |
| F02.PB20873 | F02.PB26528 | 1 | 1209 | 1207 | 1893 | 4 | 1207 | 1413 | 2099 |
| F02.PB43927 | F02.PB43301 | 444 | 1501 | 67 | 447 | 833 | 1890 | 28 | 408 |
| F02.PB37433 | F02.PB47546 | 10 | 1588 | 1586 | 2848 | 1 | 1582 | 1719 | 2980 |
| F02.PB37179 | F02.PB36655 | 20 | 1997 | 2000 | 3131 | 21 | 1984 | 2098 | 3229 |
| F02.PB20027 | F02.PB18389 | 1 | 1114 | 1115 | 1618 | 1 | 1114 | 1268 | 1771 |
| F02.PB32071 | F02.PB48397 | 1 | 2013 | 2012 | 2358 | 917 | 2931 | 3036 | 3383 |
| F02.PB5775 | F02.PB20971 | 1 | 1319 | 1319 | 1606 | 91 | 1409 | 1691 | 1977 |
| F02.PB40335 | F02.PB39570 | 342 | 3659 | 3 | 347 | 613 | 3928 | 123 | 466 |
| F02.PB36894 | F02.PB36091 | 349 | 3133 | 36 | 350 | 631 | 3434 | 76 | 387 |
| F02.PB25399 | F02.PB45170 | 1 | 1440 | 1440 | 2361 | 1 | 1440 | 1549 | 2470 |
| F02.PB20807 | F02.PB26555 | 112 | 1914 | 1 | 112 | 292 | 2097 | 44 | 155 |
| F02.PB30814 | F02.PB37162 | 122 | 2693 | 1 | 122 | 460 | 3029 | 198 | 319 |
| F02.PB23073 | F02.PB29960 | 503 | 2203 | 6 | 505 | 739 | 2431 | 1 | 500 |
| F02.PB37517 | F02.PB47491 | 1 | 2104 | 2100 | 2999 | 375 | 2479 | 2628 | 3527 |
| F02.PB35157 | F02.PB48722 | 1 | 1684 | 1682 | 3242 | 9 | 1684 | 1889 | 3449 |
| F02.PB13801 | F02.PB44474 | 112 | 1204 | 1 | 115 | 1283 | 2376 | 998 | 1112 |
| F02.PB48470 | F02.PB36406 | 1 | 2107 | 2106 | 3193 | 151 | 2257 | 2367 | 3456 |
| F02.PB26654 | F02.PB30188 | 97 | 2213 | 1 | 100 | 566 | 2682 | 209 | 306 |
| F02.PB29085 | F02.PB32270 | 703 | 2368 | 98 | 707 | 1294 | 2960 | 104 | 714 |
| F02.PB12875 | F02.PB8525 | 1 | 1015 | 1014 | 1470 | 1 | 1015 | 1149 | 1605 |
| F02.PB29546 | F02.PB46075 | 1 | 2033 | 2031 | 2656 | 1 | 2034 | 2300 | 2925 |
| F02.PB23749 | F02.PB44343 | 1 | 1183 | 1183 | 2123 | 423 | 1605 | 1712 | 2652 |
| F02.PB33197 | F02.PB40803 | 1 | 1693 | 1691 | 2488 | 309 | 2010 | 2580 | 3380 |
| F02.PB37773 | F02.PB38686 | 1 | 3151 | 3149 | 3385 | 7 | 3154 | 3312 | 3549 |
| F02.PB25051 | F02.PB29614 | 162 | 2347 | 1 | 163 | 372 | 2559 | 2 | 164 |
| F02.PB10807 | F02.PB33370 | 197 | 1736 | 5 | 201 | 620 | 2159 | 1 | 197 |
| F02.PB48434 | F02.PB41411 | 1 | 2991 | 2991 | 3185 | 5 | 2997 | 3175 | 3369 |
| F02.PB38811 | F02.PB40702 | 1321 | 3245 | 1 | 1323 | 1494 | 3401 | 39 | 1376 |
| F02.PB31557 | F02.PB48027 | 1 | 1906 | 1904 | 2535 | 356 | 2248 | 2452 | 3086 |
| F02.PB38308 | F02.PB41039 | 1 | 2287 | 2283 | 3615 | 1418 | 3705 | 2406 | 3738 |
| F02.PB39488 | F02.PB37689 | 16 | 1766 | 1766 | 3419 | 23 | 1771 | 1878 | 3531 |
| F02.PB24038 | F02.PB47961 | 1 | 1561 | 1560 | 2711 | 85 | 1638 | 2365 | 3517 |
| F02.PB36127 | F02.PB48463 | 23 | 2773 | 2771 | 3087 | 1 | 2743 | 2890 | 3206 |
| F02.PB45166 | F02.PB38332 | 1105 | 2518 | 1 | 1110 | 1631 | 3044 | 26 | 1135 |
| F02.PB45348 | F02.PB32477 | 1 | 1197 | 1195 | 2052 | 759 | 1952 | 2118 | 2946 |
| F02.PB45166 | F02.PB48557 | 1105 | 2438 | 1 | 1110 | 1714 | 3047 | 34 | 1143 |
| F02.PB46183 | F02.PB37649 | 1 | 2039 | 2040 | 2877 | 571 | 2608 | 2850 | 3687 |
| F02.PB31282 | F02.PB27418 | 145 | 2019 | 1 | 149 | 340 | 2214 | 19 | 167 |
| F02.PB30570 | F02.PB30169 | 1 | 1232 | 1233 | 1943 | 2 | 1233 | 1681 | 2390 |
| F02.PB47500 | F02.PB40547 | 257 | 3085 | 1 | 256 | 872 | 3697 | 56 | 311 |
| F02.PB40507 | F02.PB40731 | 220 | 3088 | 1 | 224 | 730 | 3598 | 180 | 403 |
| F02.PB8083 | F02.PB30046 | 415 | 1122 | 50 | 419 | 1327 | 2034 | 1 | 370 |
| F02.PB31471 | F02.PB41303 | 118 | 2068 | 1 | 121 | 1404 | 3356 | 102 | 222 |
| F02.PB38469 | F02.PB36682 | 215 | 3129 | 14 | 220 | 807 | 3721 | 38 | 244 |
| F02.PB9700 | F02.PB9956 | 225 | 1316 | 41 | 226 | 292 | 1382 | 1 | 186 |
| F02.PB28243 | F02.PB32398 | 1 | 1604 | 1603 | 2665 | 23 | 1642 | 1802 | 2864 |
| F02.PB16251 | F02.PB16983 | 18 | 734 | 731 | 998 | 17 | 733 | 1125 | 1393 |
| F02.PB43721 | F02.PB24437 | 308 | 1900 | 7 | 309 | 588 | 2181 | 1 | 303 |
| F02.PB31473 | F02.PB33646 | 1 | 1410 | 1405 | 2079 | 114 | 1527 | 1697 | 2371 |
| F02.PB21116 | F02.PB23735 | 208 | 1909 | 3 | 210 | 541 | 2240 | 1 | 207 |
| F02.PB33375 | F02.PB38740 | 1054 | 2409 | 1 | 1056 | 2420 | 3774 | 1260 | 2315 |
| F02.PB36421 | F02.PB47569 | 1 | 1694 | 1692 | 3367 | 1 | 1694 | 1822 | 3497 |
| F02.PB5229 | F02.PB29067 | 403 | 1006 | 45 | 406 | 976 | 1579 | 115 | 476 |
| F02.PB34239 | F02.PB37796 | 1 | 1948 | 1944 | 2970 | 75 | 2022 | 2214 | 3231 |
| F02.PB39891 | F02.PB36754 | 1 | 3228 | 3226 | 3592 | 94 | 3325 | 3425 | 3792 |
| F02.PB37653 | F02.PB37868 | 1285 | 3001 | 1 | 1287 | 1430 | 3148 | 6 | 1293 |
| F02.PB33806 | F02.PB38179 | 1 | 2028 | 2026 | 2966 | 62 | 2084 | 2237 | 3155 |
| F02.PB36296 | F02.PB37840 | 15 | 2330 | 2328 | 3063 | 1 | 2317 | 2593 | 3327 |
| F02.PB25051 | F02.PB29951 | 162 | 2307 | 1 | 163 | 371 | 2518 | 1 | 163 |
| F02.PB40208 | F02.PB38376 | 208 | 3273 | 1 | 210 | 371 | 3445 | 23 | 238 |
| F02.PB34180 | F02.PB40319 | 1 | 1731 | 1728 | 2890 | 32 | 1766 | 1995 | 3144 |
| F02.PB33304 | F02.PB32515 | 197 | 2271 | 19 | 199 | 775 | 2873 | 40 | 218 |
| F02.PB21424 | F02.PB23728 | 152 | 1957 | 1 | 154 | 290 | 2092 | 37 | 190 |
| F02.PB8661 | F02.PB25627 | 1 | 1114 | 1112 | 1521 | 39 | 1152 | 1327 | 1736 |
| F02.PB31990 | F02.PB47357 | 1081 | 2757 | 1 | 1084 | 1955 | 3628 | 751 | 1833 |
| F02.PB32825 | F02.PB32477 | 1 | 1952 | 1950 | 2792 | 12 | 1952 | 2118 | 2946 |
| F02.PB37863 | F02.PB48263 | 3341 | 413 | 415 | 55 | 53 | 2957 | 3336 | 3697 |
| F02.PB42309 | F02.PB27187 | 409 | 1316 | 6 | 411 | 974 | 1880 | 19 | 424 |
| F02.PB39749 | F02.PB37383 | 1 | 2119 | 2119 | 3293 | 2 | 2117 | 2351 | 3525 |
| F02.PB47585 | F02.PB47595 | 298 | 2997 | 1 | 298 | 422 | 3115 | 1 | 297 |
| F02.PB45168 | F02.PB23765 | 10 | 1931 | 1931 | 2209 | 8 | 1927 | 2103 | 2383 |
| F02.PB38469 | F02.PB40490 | 215 | 3181 | 14 | 220 | 765 | 3731 | 36 | 250 |
| F02.PB14448 | F02.PB8949 | 259 | 1065 | 4 | 261 | 711 | 1517 | 1 | 258 |
| F02.PB9318 | F02.PB30154 | 1 | 1027 | 1027 | 1419 | 173 | 1201 | 1787 | 2181 |
| F02.PB37394 | F02.PB34874 | 112 | 2702 | 2698 | 3596 | 104 | 2692 | 2922 | 3820 |
| F02.PB24282 | F02.PB44807 | 1 | 1245 | 1244 | 2008 | 90 | 1315 | 1662 | 2429 |
| F02.PB8914 | F02.PB43867 | 158 | 1241 | 25 | 159 | 764 | 1846 | 1 | 135 |
| F02.PB38911 | F02.PB38288 | 1838 | 3425 | 16 | 1837 | 1954 | 3541 | 1 | 1828 |
| F02.PB26808 | F02.PB44918 | 1 | 2195 | 2194 | 2461 | 1 | 2193 | 2367 | 2634 |
| F02.PB35893 | F02.PB39517 | 1155 | 3623 | 1 | 1155 | 1301 | 3768 | 30 | 1182 |
| F02.PB40115 | F02.PB41276 | 214 | 3170 | 13 | 217 | 1056 | 4033 | 1 | 205 |
| F02.PB38301 | F02.PB41414 | 385 | 3341 | 81 | 384 | 416 | 3373 | 6 | 308 |
| F02.PB9084 | F02.PB7433 | 380 | 1134 | 4 | 381 | 798 | 1552 | 1 | 373 |
| F02.PB25942 | F02.PB23678 | 177 | 2326 | 11 | 179 | 300 | 2449 | 1 | 169 |
| F02.PB19088 | F02.PB27454 | 1 | 1771 | 1772 | 1892 | 24 | 1787 | 1951 | 2070 |
| F02.PB41418 | F02.PB37412 | 158 | 3309 | 1 | 161 | 544 | 3694 | 1 | 161 |
| F02.PB19486 | F02.PB32032 | 1 | 1112 | 1115 | 1964 | 848 | 1961 | 2064 | 2915 |
| F02.PB19088 | F02.PB23400 | 1 | 1771 | 1772 | 1914 | 69 | 1831 | 2004 | 2146 |
| F02.PB31394 | F02.PB31977 | 232 | 2660 | 1 | 231 | 436 | 2860 | 30 | 259 |
| F02.PB28176 | F02.PB24302 | 117 | 2113 | 1 | 117 | 320 | 2317 | 57 | 174 |
| F02.PB23048 | F02.PB23458 | 1 | 1609 | 1607 | 2105 | 1 | 1611 | 1785 | 2283 |
| F02.PB44583 | F02.PB31977 | 187 | 2579 | 1 | 188 | 499 | 2893 | 74 | 261 |
| F02.PB30022 | F02.PB44905 | 1070 | 2150 | 1 | 1070 | 1440 | 2520 | 6 | 1075 |
| F02.PB24901 | F02.PB31600 | 1 | 1921 | 1920 | 2032 | 1 | 1921 | 2033 | 2143 |
| F02.PB33727 | F02.PB24891 | 284 | 2076 | 5 | 285 | 415 | 2207 | 1 | 281 |
| F02.PB48222 | F02.PB48744 | 18 | 2826 | 2828 | 3692 | 1 | 2809 | 2935 | 3799 |
| F02.PB45337 | F02.PB26110 | 1 | 1329 | 1329 | 2182 | 1 | 1330 | 1481 | 2333 |
| F02.PB40335 | F02.PB41197 | 342 | 3663 | 1 | 347 | 511 | 3829 | 17 | 364 |
| F02.PB39703 | F02.PB40083 | 166 | 3131 | 1 | 166 | 848 | 3775 | 452 | 617 |
| F02.PB9334 | F02.PB18140 | 175 | 1134 | 2 | 174 | 376 | 1333 | 3 | 175 |
| F02.PB21880 | F02.PB44850 | 1 | 1652 | 1652 | 1946 | 88 | 1739 | 1936 | 2232 |
| F02.PB42747 | F02.PB5363 | 169 | 1065 | 25 | 173 | 272 | 1168 | 23 | 171 |
| F02.PB33600 | F02.PB33912 | 13 | 2071 | 2066 | 2631 | 19 | 2077 | 2309 | 2880 |
| F02.PB12822 | F02.PB19625 | 311 | 1086 | 32 | 315 | 586 | 1361 | 1 | 284 |
| F02.PB43302 | F02.PB36047 | 393 | 1305 | 4 | 393 | 2129 | 3040 | 1615 | 2003 |
| F02.PB20175 | F02.PB43105 | 274 | 1080 | 35 | 276 | 480 | 1296 | 6 | 247 |
| F02.PB36259 | F02.PB40442 | 1 | 1981 | 1976 | 3140 | 2 | 1986 | 2091 | 3258 |
| F02.PB41345 | F02.PB39061 | 3529 | 1745 | 1747 | 155 | 251 | 2037 | 2185 | 3785 |
| F02.PB36010 | F02.PB39609 | 677 | 3014 | 69 | 677 | 927 | 3268 | 201 | 816 |
| F02.PB41025 | F02.PB37899 | 20 | 2012 | 2012 | 3047 | 91 | 2095 | 2366 | 3399 |
| F02.PB45533 | F02.PB34689 | 1224 | 2613 | 1 | 1223 | 1376 | 2763 | 2 | 1223 |
| F02.PB32428 | F02.PB37816 | 1348 | 2890 | 1 | 1348 | 1551 | 3093 | 1 | 1353 |
| F02.PB23678 | F02.PB32515 | 168 | 2398 | 1 | 169 | 642 | 2873 | 51 | 218 |
| F02.PB27956 | F02.PB25674 | 530 | 2064 | 67 | 531 | 589 | 2119 | 1 | 465 |
| F02.PB42179 | F02.PB23099 | 1 | 1346 | 1346 | 1684 | 207 | 1552 | 1721 | 2060 |
| F02.PB35073 | F02.PB38507 | 1 | 3016 | 3015 | 3904 | 1 | 3016 | 3124 | 4011 |
| F02.PB24741 | F02.PB30586 | 873 | 2011 | 92 | 878 | 1036 | 2174 | 1 | 788 |
| F02.PB35739 | F02.PB39978 | 1 | 1945 | 1942 | 3621 | 47 | 1991 | 2126 | 3786 |
| F02.PB33616 | F02.PB31948 | 110 | 2176 | 1 | 111 | 286 | 2353 | 48 | 158 |
| F02.PB45348 | F02.PB34064 | 1 | 1350 | 1350 | 2054 | 743 | 2093 | 2254 | 2952 |
| F02.PB24243 | F02.PB46025 | 635 | 2367 | 7 | 630 | 1038 | 2766 | 79 | 702 |
| F02.PB32446 | F02.PB26276 | 1 | 1644 | 1643 | 2322 | 5 | 1653 | 1940 | 2620 |
| F02.PB31956 | F02.PB31072 | 1 | 1930 | 1928 | 2195 | 15 | 1946 | 2049 | 2317 |
| F02.PB32881 | F02.PB30706 | 1 | 2191 | 2191 | 2775 | 4 | 2192 | 2312 | 2894 |
| F02.PB24901 | F02.PB24706 | 15 | 1921 | 1920 | 2032 | 11 | 1916 | 2028 | 2138 |
| F02.PB13266 | F02.PB24727 | 273 | 1532 | 6 | 274 | 576 | 1835 | 1 | 269 |
| F02.PB47460 | F02.PB40128 | 1 | 2575 | 2575 | 3341 | 64 | 2638 | 2750 | 3516 |
| F02.PB39644 | F02.PB40353 | 14 | 2697 | 2693 | 3432 | 21 | 2704 | 3001 | 3742 |
| F02.PB32428 | F02.PB39620 | 1348 | 2905 | 1 | 1347 | 1482 | 3040 | 1 | 1349 |
| F02.PB35572 | F02.PB36621 | 456 | 3198 | 86 | 455 | 510 | 3247 | 31 | 400 |
| F02.PB31127 | F02.PB25024 | 109 | 2010 | 1 | 107 | 318 | 2229 | 25 | 131 |
| F02.PB33911 | F02.PB40197 | 180 | 2865 | 1 | 179 | 297 | 2972 | 5 | 182 |
| F02.PB47500 | F02.PB38501 | 257 | 3085 | 1 | 256 | 818 | 3643 | 2 | 257 |
| F02.PB48205 | F02.PB40539 | 14 | 1764 | 1759 | 3082 | 71 | 1821 | 1983 | 3306 |
| F02.PB18485 | F02.PB42291 | 1 | 1095 | 1092 | 1403 | 1 | 1101 | 1351 | 1665 |
| F02.PB31822 | F02.PB24182 | 1 | 1990 | 1988 | 2689 | 1 | 1991 | 2152 | 2852 |
| F02.PB37681 | F02.PB38403 | 2 | 2588 | 2587 | 3091 | 1 | 2575 | 2675 | 3180 |
| F02.PB34609 | F02.PB39844 | 597 | 2961 | 99 | 596 | 702 | 3069 | 31 | 528 |
| F02.PB27677 | F02.PB27488 | 448 | 2169 | 47 | 448 | 1131 | 2852 | 49 | 450 |
| F02.PB34045 | F02.PB38514 | 1 | 1482 | 1478 | 2473 | 399 | 1873 | 2201 | 3196 |
| F02.PB13006 | F02.PB42857 | 143 | 1090 | 6 | 143 | 355 | 1302 | 1 | 139 |
| F02.PB12151 | F02.PB21573 | 1 | 1054 | 1054 | 1711 | 5 | 1062 | 1191 | 1861 |
| F02.PB18806 | F02.PB22696 | 501 | 1992 | 73 | 504 | 621 | 2112 | 1 | 432 |
| F02.PB29146 | F02.PB46177 | 1124 | 2536 | 1 | 1127 | 1521 | 2933 | 25 | 1151 |
| F02.PB24306 | F02.PB28737 | 1 | 1445 | 1443 | 1962 | 57 | 1501 | 1629 | 2149 |
| F02.PB32635 | F02.PB34064 | 18 | 2110 | 2110 | 2789 | 1 | 2093 | 2254 | 2931 |
| F02.PB33036 | F02.PB22803 | 17 | 1917 | 1913 | 2154 | 50 | 1951 | 2078 | 2316 |
| F02.PB21530 | F02.PB44628 | 1 | 1694 | 1691 | 1978 | 29 | 1722 | 1826 | 2113 |
| F02.PB47568 | F02.PB36005 | 21 | 2517 | 2512 | 3261 | 19 | 2511 | 2756 | 3502 |
| F02.PB32252 | F02.PB36898 | 449 | 2754 | 8 | 451 | 837 | 3146 | 11 | 459 |
| F02.PB30103 | F02.PB37003 | 1 | 1614 | 1612 | 2783 | 256 | 1872 | 1992 | 3160 |
| F02.PB26833 | F02.PB44343 | 1 | 1599 | 1599 | 2496 | 7 | 1605 | 1712 | 2608 |
| F02.PB9193 | F02.PB17059 | 8 | 685 | 683 | 1090 | 1 | 678 | 781 | 1188 |
| F02.PB44458 | F02.PB36081 | 272 | 2639 | 8 | 273 | 725 | 3092 | 4 | 269 |
| F02.PB23413 | F02.PB27884 | 357 | 2483 | 4 | 356 | 512 | 2646 | 45 | 398 |
| F02.PB38682 | F02.PB40518 | 1481 | 3257 | 1 | 1477 | 1662 | 3438 | 51 | 1526 |
| F02.PB33036 | F02.PB23205 | 18 | 1917 | 1913 | 2224 | 9 | 1915 | 2042 | 2350 |
| F02.PB19365 | F02.PB13177 | 133 | 1286 | 28 | 138 | 305 | 1458 | 4 | 113 |
| F02.PB26399 | F02.PB38664 | 791 | 2410 | 97 | 791 | 1466 | 3085 | 609 | 1309 |
| F02.PB35632 | F02.PB37904 | 1 | 2260 | 2259 | 3035 | 1 | 2261 | 2405 | 3181 |
| F02.PB36487 | F02.PB47681 | 1 | 2091 | 2089 | 3353 | 3 | 2094 | 2408 | 3674 |
| F02.PB22398 | F02.PB18958 | 335 | 1047 | 4 | 336 | 450 | 1157 | 1 | 349 |
| F02.PB27970 | F02.PB38172 | 1 | 1395 | 1392 | 2397 | 411 | 1807 | 1957 | 2979 |
| F02.PB22966 | F02.PB31259 | 300 | 2451 | 53 | 304 | 382 | 2533 | 8 | 259 |
| F02.PB37789 | F02.PB35806 | 3022 | 153 | 157 | 1 | 55 | 2935 | 3059 | 3215 |
| F02.PB29843 | F02.PB40726 | 1 | 2107 | 2104 | 2605 | 1 | 2107 | 2570 | 3074 |
| F02.PB39717 | F02.PB38063 | 120 | 2176 | 2176 | 3122 | 54 | 2117 | 2244 | 3189 |
| F02.PB47719 | F02.PB36800 | 1018 | 3189 | 1 | 1018 | 1383 | 3546 | 1 | 1018 |
| F02.PB48604 | F02.PB48688 | 1151 | 2968 | 1 | 1154 | 1284 | 3102 | 1 | 1141 |
| F02.PB42324 | F02.PB16610 | 1 | 1113 | 1109 | 1317 | 1 | 1116 | 1297 | 1504 |
| F02.PB32145 | F02.PB34023 | 134 | 2016 | 1 | 135 | 959 | 2841 | 167 | 301 |
| F02.PB42019 | F02.PB15354 | 357 | 1211 | 8 | 359 | 587 | 1441 | 1 | 352 |
| F02.PB36931 | F02.PB47191 | 156 | 3019 | 15 | 156 | 709 | 3572 | 1 | 142 |
| F02.PB25790 | F02.PB27494 | 375 | 2266 | 59 | 374 | 424 | 2312 | 1 | 316 |
| F02.PB39942 | F02.PB39300 | 1166 | 3840 | 1 | 1165 | 1345 | 4005 | 47 | 1211 |
| F02.PB22164 | F02.PB33518 | 223 | 1891 | 3 | 223 | 708 | 2376 | 1 | 222 |
| F02.PB22625 | F02.PB9919 | 425 | 1240 | 44 | 424 | 560 | 1379 | 80 | 460 |
| F02.PB24088 | F02.PB47117 | 14 | 2347 | 2344 | 2570 | 1 | 2333 | 2943 | 3169 |
| F02.PB32269 | F02.PB41197 | 106 | 2724 | 1 | 111 | 1261 | 3879 | 10 | 120 |
| F02.PB40559 | F02.PB37584 | 672 | 3300 | 94 | 675 | 822 | 3450 | 1 | 582 |
| F02.PB25799 | F02.PB25682 | 1 | 1399 | 1394 | 2315 | 49 | 1460 | 1703 | 2625 |
| F02.PB34816 | F02.PB38659 | 526 | 3388 | 6 | 530 | 810 | 3669 | 8 | 521 |
| F02.PB16744 | F02.PB44672 | 1 | 1271 | 1269 | 1507 | 15 | 1286 | 2048 | 2287 |
| F02.PB30840 | F02.PB29614 | 114 | 2260 | 1 | 115 | 372 | 2518 | 1 | 115 |
| F02.PB19054 | F02.PB22521 | 289 | 1017 | 29 | 290 | 418 | 1147 | 29 | 290 |
| F02.PB33646 | F02.PB39490 | 1 | 1380 | 1381 | 2371 | 392 | 1771 | 2130 | 3120 |
| F02.PB43907 | F02.PB45216 | 246 | 1988 | 87 | 247 | 756 | 2498 | 29 | 190 |
| F02.PB29351 | F02.PB39753 | 1 | 1711 | 1711 | 2115 | 231 | 1942 | 2076 | 2483 |
| F02.PB32675 | F02.PB46180 | 1 | 1185 | 1185 | 2199 | 549 | 1733 | 1855 | 2868 |
| F02.PB24165 | F02.PB45768 | 191 | 2093 | 1 | 194 | 947 | 2849 | 1 | 194 |
| F02.PB25104 | F02.PB45288 | 136 | 2285 | 1 | 136 | 307 | 2454 | 39 | 171 |
| F02.PB34973 | F02.PB40702 | 1310 | 3234 | 1 | 1312 | 1494 | 3401 | 38 | 1376 |
| F02.PB44821 | F02.PB22809 | 1 | 1527 | 1523 | 2049 | 106 | 1635 | 1871 | 2397 |
| F02.PB32403 | F02.PB31973 | 1 | 1449 | 1448 | 2647 | 39 | 1487 | 1782 | 2981 |
| F02.PB36857 | F02.PB36334 | 1513 | 3171 | 1 | 1513 | 1740 | 3398 | 6 | 1517 |
| F02.PB21316 | F02.PB44544 | 140 | 1756 | 1 | 141 | 393 | 2044 | 31 | 164 |
| F02.PB33233 | F02.PB33538 | 1 | 1511 | 1510 | 1974 | 12 | 1528 | 1837 | 2306 |
| F02.PB31127 | F02.PB30375 | 105 | 2061 | 1 | 107 | 399 | 2357 | 53 | 160 |
| F02.PB25696 | F02.PB27384 | 1 | 1666 | 1664 | 2556 | 2 | 1633 | 1869 | 2761 |
| F02.PB23924 | F02.PB22958 | 1 | 1414 | 1413 | 2646 | 128 | 1541 | 1648 | 2881 |
| F02.PB35875 | F02.PB39760 | 151 | 3247 | 1 | 150 | 516 | 3610 | 101 | 246 |
| F02.PB38883 | F02.PB38940 | 1350 | 3186 | 1 | 1346 | 1833 | 3668 | 364 | 1709 |
| F02.PB34045 | F02.PB39463 | 1 | 1482 | 1478 | 2475 | 508 | 1984 | 2307 | 3302 |
| F02.PB26601 | F02.PB37967 | 1 | 2048 | 2045 | 2639 | 3 | 2050 | 2169 | 2764 |
| F02.PB40272 | F02.PB39838 | 1579 | 3133 | 1 | 1582 | 1830 | 3383 | 137 | 1709 |
| F02.PB39644 | F02.PB37235 | 14 | 2697 | 2693 | 3414 | 23 | 2706 | 3048 | 3772 |
| F02.PB6331 | F02.PB24402 | 282 | 1592 | 55 | 286 | 962 | 2272 | 143 | 374 |
| F02.PB22615 | F02.PB14082 | 411 | 1048 | 7 | 411 | 510 | 1149 | 1 | 405 |
| F02.PB45678 | F02.PB24088 | 1 | 2345 | 2344 | 2541 | 12 | 2345 | 2453 | 2649 |
| F02.PB31782 | F02.PB48603 | 1 | 2468 | 2463 | 2861 | 9 | 2480 | 2594 | 2993 |
| F02.PB38582 | F02.PB47871 | 1 | 1817 | 1815 | 2973 | 1 | 1817 | 2071 | 3229 |
| F02.PB34681 | F02.PB32045 | 1 | 1426 | 1428 | 2145 | 52 | 1477 | 1606 | 2323 |
| F02.PB36917 | F02.PB48346 | 1 | 2451 | 2449 | 3261 | 1 | 2451 | 2604 | 3415 |
| F02.PB25942 | F02.PB27793 | 177 | 2290 | 1 | 179 | 330 | 2443 | 19 | 197 |
| F02.PB11501 | F02.PB5985 | 1 | 832 | 830 | 988 | 29 | 860 | 969 | 1124 |
| F02.PB25942 | F02.PB32515 | 177 | 2275 | 1 | 179 | 775 | 2873 | 41 | 218 |
| F02.PB38922 | F02.PB48098 | 21 | 2911 | 2906 | 3721 | 5 | 2893 | 3019 | 3834 |
| F02.PB15496 | F02.PB42079 | 209 | 1170 | 27 | 209 | 484 | 1445 | 1 | 191 |
| F02.PB41477 | F02.PB40009 | 107 | 1985 | 1986 | 3197 | 17 | 1893 | 2088 | 3299 |
| F02.PB19091 | F02.PB44621 | 248 | 1923 | 33 | 249 | 438 | 2113 | 1 | 217 |
| F02.PB36457 | F02.PB40560 | 216 | 3093 | 15 | 221 | 808 | 3685 | 87 | 293 |
| F02.PB42179 | F02.PB27530 | 1 | 1346 | 1346 | 1684 | 201 | 1561 | 1730 | 2069 |
| F02.PB24953 | F02.PB37972 | 98 | 2665 | 1 | 102 | 942 | 3509 | 1 | 102 |
| F02.PB37050 | F02.PB41493 | 1 | 2786 | 2785 | 3082 | 28 | 2812 | 2926 | 3223 |
| F02.PB39903 | F02.PB39763 | 253 | 3188 | 1 | 254 | 490 | 3423 | 70 | 323 |
| F02.PB33793 | F02.PB46104 | 1 | 2440 | 2437 | 2922 | 5 | 2452 | 2557 | 3042 |
| F02.PB36135 | F02.PB37904 | 13 | 2259 | 2258 | 3029 | 8 | 2261 | 2405 | 3181 |
| F02.PB31471 | F02.PB39009 | 118 | 2068 | 1 | 121 | 1302 | 3254 | 2 | 122 |
| F02.PB34702 | F02.PB39710 | 1 | 2094 | 2093 | 2860 | 1 | 2094 | 2201 | 2968 |
| F02.PB7598 | F02.PB18303 | 164 | 1108 | 7 | 165 | 259 | 1208 | 1 | 157 |
| F02.PB24120 | F02.PB35162 | 1 | 1884 | 1888 | 2087 | 685 | 2568 | 2975 | 3172 |
| F02.PB38475 | F02.PB47887 | 1 | 1815 | 1816 | 3383 | 27 | 1847 | 1957 | 3524 |
| F02.PB33006 | F02.PB40197 | 122 | 2880 | 1 | 121 | 297 | 3056 | 1 | 121 |
| F02.PB31784 | F02.PB47303 | 794 | 2553 | 81 | 797 | 960 | 2719 | 1 | 717 |
| F02.PB8578 | F02.PB21348 | 291 | 1173 | 4 | 293 | 1083 | 1963 | 1 | 288 |
| F02.PB10357 | F02.PB44203 | 393 | 1332 | 6 | 394 | 976 | 1914 | 1 | 389 |
| F02.PB40590 | F02.PB36021 | 179 | 3242 | 1 | 180 | 337 | 3400 | 1 | 180 |
| F02.PB37115 | F02.PB48556 | 2 | 2028 | 2025 | 2946 | 3 | 2024 | 2132 | 3041 |
| F02.PB32145 | F02.PB33653 | 134 | 2065 | 1 | 135 | 856 | 2787 | 64 | 198 |
| F02.PB23646 | F02.PB47214 | 592 | 2144 | 63 | 590 | 1006 | 2559 | 1 | 528 |
| F02.PB37802 | F02.PB36760 | 1404 | 3079 | 1 | 1406 | 1974 | 3651 | 15 | 1444 |
| F02.PB32542 | F02.PB30401 | 1 | 1902 | 1899 | 2084 | 34 | 1931 | 2052 | 2239 |
| F02.PB25808 | F02.PB32020 | 102 | 1922 | 1922 | 2805 | 18 | 1830 | 1947 | 2830 |
| F02.PB42617 | F02.PB9356 | 139 | 1230 | 9 | 139 | 393 | 1485 | 4 | 134 |
| F02.PB25219 | F02.PB29371 | 291 | 2068 | 49 | 291 | 388 | 2166 | 1 | 243 |
| F02.PB21316 | F02.PB24534 | 140 | 1756 | 1 | 141 | 479 | 2125 | 107 | 247 |
| F02.PB17684 | F02.PB33383 | 210 | 1967 | 3 | 210 | 367 | 2134 | 3 | 209 |
| F02.PB42875 | F02.PB13136 | 155 | 1553 | 1 | 155 | 297 | 1694 | 6 | 159 |
| F02.PB46979 | F02.PB40836 | 1528 | 3100 | 1 | 1528 | 1680 | 3252 | 4 | 1544 |
| F02.PB35148 | F02.PB40042 | 110 | 2122 | 2123 | 3289 | 5 | 2021 | 2251 | 3415 |
| F02.PB38560 | F02.PB38163 | 456 | 3008 | 83 | 455 | 689 | 3235 | 137 | 502 |
| F02.PB40691 | F02.PB40201 | 114 | 3086 | 1 | 113 | 783 | 3749 | 515 | 626 |
| F02.PB48586 | F02.PB37684 | 244 | 3608 | 1 | 247 | 601 | 3965 | 5 | 255 |
| F02.PB28788 | F02.PB26997 | 1 | 1757 | 1757 | 2092 | 314 | 2070 | 2172 | 2507 |
| F02.PB39919 | F02.PB36480 | 1366 | 3052 | 1 | 1368 | 1673 | 3362 | 165 | 1538 |
| F02.PB45533 | F02.PB32528 | 1224 | 2648 | 1 | 1223 | 1368 | 2792 | 2 | 1215 |
| F02.PB41199 | F02.PB36166 | 156 | 3760 | 1 | 155 | 348 | 3951 | 88 | 242 |
| F02.PB20812 | F02.PB32752 | 1 | 1509 | 1506 | 1913 | 1 | 1509 | 1663 | 2070 |
| F02.PB41472 | F02.PB47269 | 116 | 2083 | 2080 | 3212 | 20 | 1987 | 2228 | 3360 |
| F02.PB25116 | F02.PB39615 | 1 | 2221 | 2217 | 2698 | 1141 | 3361 | 3491 | 3972 |
| F02.PB32660 | F02.PB47228 | 1 | 2472 | 2471 | 2729 | 7 | 2472 | 2776 | 3034 |
| F02.PB42875 | F02.PB21959 | 155 | 1566 | 1 | 153 | 488 | 1905 | 196 | 348 |
| F02.PB29919 | F02.PB39844 | 593 | 2959 | 95 | 592 | 702 | 3069 | 31 | 528 |
| F02.PB34239 | F02.PB41200 | 1 | 1948 | 1944 | 2971 | 150 | 2097 | 2289 | 3316 |
| F02.PB10195 | F02.PB30893 | 1 | 1036 | 1033 | 1646 | 124 | 1155 | 1471 | 2080 |
| F02.PB22791 | F02.PB36821 | 209 | 2728 | 1 | 208 | 755 | 3272 | 1 | 208 |
| F02.PB28977 | F02.PB23775 | 149 | 2136 | 1 | 148 | 398 | 2385 | 1 | 148 |
| F02.PB27102 | F02.PB32814 | 206 | 2246 | 1 | 205 | 364 | 2405 | 17 | 221 |
| F02.PB38514 | F02.PB39463 | 205 | 3186 | 15 | 204 | 314 | 3292 | 11 | 200 |
| F02.PB48779 | F02.PB37854 | 1 | 1584 | 1582 | 2956 | 22 | 1606 | 1909 | 3303 |
| F02.PB41508 | F02.PB40009 | 1 | 1822 | 1823 | 3044 | 75 | 1893 | 2088 | 3300 |
| F02.PB47211 | F02.PB48613 | 1 | 1739 | 1740 | 3016 | 1582 | 3320 | 2242 | 3518 |
| F02.PB29596 | F02.PB46025 | 1 | 1816 | 1815 | 2349 | 69 | 1880 | 2240 | 2774 |
| F02.PB29351 | F02.PB39829 | 14 | 1711 | 1711 | 2115 | 386 | 2081 | 2216 | 2620 |
| F02.PB40272 | F02.PB39831 | 1579 | 3133 | 1 | 1582 | 1739 | 3293 | 59 | 1617 |
| F02.PB24442 | F02.PB32525 | 188 | 2251 | 18 | 188 | 349 | 2412 | 33 | 206 |
| F02.PB36944 | F02.PB36374 | 1 | 1991 | 1990 | 3178 | 1 | 1991 | 2172 | 3360 |
| F02.PB32428 | F02.PB35017 | 1348 | 2904 | 1 | 1348 | 1714 | 3270 | 1 | 1348 |
| F02.PB39112 | F02.PB47144 | 1 | 2752 | 2753 | 3233 | 23 | 2775 | 2934 | 3413 |
| F02.PB32213 | F02.PB47119 | 308 | 2530 | 31 | 308 | 937 | 3159 | 551 | 828 |
| F02.PB24568 | F02.PB26144 | 127 | 2546 | 1 | 127 | 254 | 2677 | 11 | 137 |
| F02.PB43302 | F02.PB45622 | 390 | 1309 | 4 | 393 | 1722 | 2641 | 1171 | 1560 |
| F02.PB46979 | F02.PB35128 | 1528 | 3100 | 1 | 1528 | 1664 | 3236 | 1 | 1528 |
| F02.PB34177 | F02.PB39796 | 181 | 2920 | 1 | 180 | 454 | 3190 | 69 | 248 |
| F02.PB10979 | F02.PB21035 | 541 | 1523 | 6 | 543 | 889 | 1869 | 1 | 537 |
| F02.PB27825 | F02.PB29382 | 1 | 1886 | 1884 | 2090 | 3 | 1875 | 2072 | 2277 |
| F02.PB19897 | F02.PB19567 | 116 | 1219 | 1 | 121 | 624 | 1727 | 1 | 121 |
| F02.PB38391 | F02.PB35769 | 1 | 1667 | 1665 | 3039 | 1 | 1678 | 1799 | 3171 |
| F02.PB36315 | F02.PB40130 | 1004 | 3215 | 1 | 1007 | 1211 | 3414 | 90 | 1094 |
| F02.PB20079 | F02.PB34625 | 1 | 1362 | 1362 | 1956 | 88 | 1441 | 1608 | 2212 |
| F02.PB33275 | F02.PB40436 | 309 | 2801 | 39 | 309 | 560 | 3052 | 46 | 316 |
| F02.PB38308 | F02.PB40565 | 1 | 2287 | 2283 | 3596 | 1532 | 3819 | 2520 | 3833 |
| F02.PB45010 | F02.PB37242 | 1 | 1108 | 1108 | 1913 | 4 | 1110 | 2711 | 3516 |
| F02.PB33431 | F02.PB32593 | 239 | 2827 | 1 | 240 | 348 | 2935 | 6 | 245 |
| F02.PB36457 | F02.PB40490 | 216 | 3093 | 15 | 221 | 765 | 3642 | 36 | 250 |
| F02.PB19054 | F02.PB22520 | 289 | 1017 | 29 | 290 | 419 | 1148 | 30 | 291 |
| F02.PB27179 | F02.PB23193 | 1 | 1773 | 1770 | 2234 | 1 | 1773 | 1896 | 2361 |
| F02.PB39581 | F02.PB39514 | 1 | 3100 | 3097 | 3321 | 529 | 3624 | 3756 | 3979 |
| F02.PB38191 | F02.PB47261 | 1 | 1988 | 1988 | 3327 | 1608 | 3597 | 2404 | 3743 |
| F02.PB47790 | F02.PB47961 | 1 | 1613 | 1613 | 3102 | 25 | 1637 | 2097 | 3586 |
| F02.PB25985 | F02.PB28015 | 138 | 2167 | 1 | 140 | 319 | 2356 | 67 | 206 |
| F02.PB39231 | F02.PB37868 | 1276 | 2970 | 1 | 1278 | 1430 | 3121 | 18 | 1293 |
| F02.PB35533 | F02.PB47455 | 1427 | 3241 | 13 | 1429 | 1933 | 3744 | 140 | 1555 |
| F02.PB10944 | F02.PB21724 | 1 | 1191 | 1191 | 1647 | 15 | 1224 | 1506 | 1961 |
| F02.PB41038 | F02.PB46981 | 219 | 3032 | 14 | 219 | 358 | 3168 | 1 | 205 |
| F02.PB38607 | F02.PB36020 | 102 | 3742 | 1 | 105 | 285 | 3925 | 68 | 172 |
| F02.PB31473 | F02.PB26156 | 1 | 1410 | 1405 | 2079 | 583 | 1996 | 2166 | 2840 |
| F02.PB41432 | F02.PB36655 | 111 | 2074 | 2077 | 3208 | 21 | 1984 | 2098 | 3229 |
| F02.PB47431 | F02.PB48571 | 1 | 2378 | 2378 | 3013 | 379 | 2756 | 2979 | 3623 |
| F02.PB8993 | F02.PB42265 | 177 | 1077 | 7 | 178 | 314 | 1215 | 5 | 177 |
| F02.PB46282 | F02.PB41442 | 1115 | 2947 | 1 | 1117 | 1452 | 3284 | 2 | 1118 |
| F02.PB29351 | F02.PB47699 | 1 | 1711 | 1711 | 2115 | 193 | 1904 | 2038 | 2442 |
| F02.PB33919 | F02.PB40226 | 120 | 2854 | 1 | 122 | 362 | 3087 | 44 | 165 |
| F02.PB13557 | F02.PB8992 | 189 | 1344 | 41 | 189 | 249 | 1389 | 1 | 144 |
| F02.PB31665 | F02.PB31259 | 299 | 2449 | 47 | 303 | 382 | 2532 | 3 | 259 |
| F02.PB34248 | F02.PB34214 | 1 | 1885 | 1882 | 2815 | 23 | 1908 | 2017 | 2949 |
| F02.PB11420 | F02.PB45092 | 142 | 1690 | 1 | 142 | 1128 | 2676 | 1 | 142 |
| F02.PB24741 | F02.PB33746 | 873 | 2011 | 92 | 878 | 1174 | 2312 | 139 | 926 |
| F02.PB38024 | F02.PB48417 | 1 | 2150 | 2148 | 3356 | 17 | 2167 | 2291 | 3496 |
| F02.PB10828 | F02.PB46068 | 234 | 1377 | 41 | 235 | 918 | 2063 | 22 | 221 |
| F02.PB17590 | F02.PB33920 | 1 | 1055 | 1055 | 1968 | 4 | 1058 | 1715 | 2627 |
| F02.PB38946 | F02.PB48098 | 1 | 2889 | 2884 | 3701 | 3 | 2893 | 3019 | 3834 |
| F02.PB21680 | F02.PB31201 | 1 | 1012 | 1009 | 1950 | 5 | 1016 | 1121 | 2083 |
| F02.PB5542 | F02.PB42190 | 1 | 1140 | 1137 | 1527 | 1 | 1139 | 1281 | 1671 |
| F02.PB38644 | F02.PB47996 | 1 | 1908 | 1908 | 3175 | 2 | 1913 | 2040 | 3312 |
| F02.PB27949 | F02.PB46005 | 1104 | 2204 | 1 | 1106 | 1265 | 2367 | 1 | 1087 |
| F02.PB38682 | F02.PB40595 | 1481 | 3257 | 1 | 1477 | 1625 | 3395 | 16 | 1489 |
| F02.PB16679 | F02.PB23728 | 117 | 1320 | 1 | 119 | 955 | 2159 | 577 | 695 |
| F02.PB38607 | F02.PB37734 | 102 | 3704 | 1 | 105 | 471 | 4073 | 254 | 358 |
| F02.PB46183 | F02.PB38951 | 1 | 2039 | 2040 | 2877 | 989 | 3027 | 3269 | 4106 |
| F02.PB48190 | F02.PB40106 | 18 | 3203 | 3204 | 3321 | 15 | 3206 | 3372 | 3484 |
| F02.PB31001 | F02.PB39490 | 1 | 1287 | 1283 | 2280 | 509 | 1798 | 2125 | 3122 |
| F02.PB20077 | F02.PB22213 | 131 | 1150 | 9 | 135 | 842 | 1861 | 10 | 136 |
| F02.PB38191 | F02.PB48613 | 1 | 1988 | 1988 | 3288 | 1445 | 3434 | 2241 | 3540 |
| F02.PB29224 | F02.PB25715 | 13 | 1372 | 1367 | 2111 | 1 | 1349 | 1452 | 2195 |
| F02.PB31917 | F02.PB33652 | 241 | 2782 | 10 | 240 | 359 | 2901 | 1 | 231 |
| F02.PB45635 | F02.PB41302 | 218 | 2920 | 1 | 223 | 525 | 3227 | 54 | 276 |
| F02.PB30548 | F02.PB33130 | 262 | 2556 | 32 | 267 | 425 | 2747 | 1 | 237 |
| F02.PB21060 | F02.PB31090 | 177 | 1838 | 1 | 177 | 760 | 2418 | 155 | 331 |
| F02.PB36235 | F02.PB35569 | 106 | 3241 | 1 | 106 | 229 | 3360 | 9 | 114 |
| F02.PB27373 | F02.PB33988 | 127 | 2368 | 1 | 128 | 247 | 2485 | 2 | 129 |
| F02.PB22941 | F02.PB23975 | 129 | 2065 | 1 | 129 | 383 | 2319 | 1 | 129 |
| F02.PB33304 | F02.PB27793 | 197 | 2286 | 19 | 199 | 330 | 2443 | 18 | 197 |
| F02.PB39111 | F02.PB47275 | 689 | 3195 | 9 | 688 | 869 | 3370 | 1 | 680 |
| F02.PB5484 | F02.PB12488 | 144 | 1129 | 2 | 145 | 276 | 1265 | 1 | 144 |
| F02.PB29950 | F02.PB40702 | 203 | 2109 | 1 | 205 | 1494 | 3401 | 1172 | 1376 |
| F02.PB38796 | F02.PB36732 | 1 | 2953 | 2951 | 3266 | 132 | 3083 | 3200 | 3515 |
| F02.PB38607 | F02.PB41199 | 102 | 3730 | 1 | 105 | 226 | 3853 | 9 | 113 |
| F02.PB16695 | F02.PB32177 | 1 | 1130 | 1128 | 1332 | 621 | 1751 | 2344 | 2548 |
| F02.PB20278 | F02.PB31682 | 198 | 1046 | 26 | 201 | 815 | 1663 | 41 | 215 |
| F02.PB44070 | F02.PB32104 | 1 | 1042 | 1043 | 2088 | 606 | 1647 | 1818 | 2863 |
| F02.PB31697 | F02.PB29313 | 1115 | 2342 | 1 | 1118 | 1354 | 2582 | 1 | 1117 |
| F02.PB45836 | F02.PB25040 | 247 | 2542 | 23 | 246 | 370 | 2667 | 3 | 225 |
| F02.PB47965 | F02.PB40820 | 1393 | 3026 | 1 | 1393 | 1544 | 3177 | 30 | 1422 |
| F02.PB34173 | F02.PB36280 | 1 | 2155 | 2153 | 2869 | 6 | 2152 | 2337 | 3055 |
| F02.PB44168 | F02.PB23474 | 200 | 1754 | 3 | 196 | 575 | 2129 | 1 | 194 |
| F02.PB24491 | F02.PB40905 | 436 | 2235 | 47 | 435 | 1189 | 2986 | 1 | 389 |
| F02.PB34360 | F02.PB47578 | 1 | 1678 | 1675 | 2604 | 162 | 1839 | 2295 | 3224 |
| F02.PB21771 | F02.PB19426 | 1 | 1424 | 1422 | 1803 | 36 | 1459 | 1561 | 1942 |
| F02.PB30277 | F02.PB28718 | 192 | 2524 | 1 | 193 | 468 | 2800 | 100 | 292 |
| F02.PB40018 | F02.PB47557 | 1 | 3080 | 3078 | 3320 | 597 | 3667 | 3825 | 4067 |
| F02.PB44070 | F02.PB26156 | 1 | 1042 | 1043 | 2088 | 583 | 1624 | 1795 | 2840 |
| F02.PB42737 | F02.PB25422 | 1 | 1270 | 1274 | 1598 | 1 | 1268 | 1840 | 2164 |
| F02.PB31476 | F02.PB44715 | 1 | 1569 | 1569 | 2244 | 20 | 1598 | 1847 | 2523 |
| F02.PB36844 | F02.PB36197 | 398 | 2990 | 87 | 400 | 710 | 3302 | 64 | 377 |
| F02.PB36994 | F02.PB37074 | 17 | 2609 | 2608 | 3188 | 2 | 2593 | 2701 | 3281 |
| F02.PB35686 | F02.PB48412 | 1340 | 3167 | 1 | 1344 | 1603 | 3430 | 131 | 1474 |
| F02.PB7608 | F02.PB27307 | 194 | 1564 | 5 | 194 | 1222 | 2578 | 4 | 192 |
| F02.PB6462 | F02.PB28362 | 262 | 1542 | 38 | 265 | 840 | 2119 | 1 | 228 |
| F02.PB25871 | F02.PB46125 | 1 | 1588 | 1584 | 2243 | 32 | 1637 | 2219 | 2879 |
| F02.PB39185 | F02.PB38729 | 1390 | 3246 | 1 | 1392 | 1875 | 3732 | 5 | 1395 |
| F02.PB34731 | F02.PB37899 | 1 | 2095 | 2095 | 3128 | 1 | 2095 | 2366 | 3399 |
| F02.PB35795 | F02.PB47246 | 257 | 3097 | 1 | 256 | 443 | 3283 | 7 | 263 |
| F02.PB28253 | F02.PB30306 | 1 | 1265 | 1263 | 1965 | 4 | 1269 | 1374 | 2075 |
| F02.PB34239 | F02.PB34921 | 1 | 1948 | 1944 | 2964 | 66 | 2013 | 2205 | 3236 |
| F02.PB26612 | F02.PB22790 | 118 | 2103 | 1 | 120 | 325 | 2312 | 22 | 141 |
| F02.PB21635 | F02.PB34408 | 223 | 1913 | 39 | 228 | 988 | 2675 | 19 | 207 |
| F02.PB27460 | F02.PB35827 | 1 | 2031 | 2026 | 2629 | 1301 | 3331 | 3520 | 4123 |
| F02.PB34905 | F02.PB35124 | 1 | 3165 | 3166 | 3511 | 1 | 3165 | 3437 | 3782 |
| F02.PB26612 | F02.PB27000 | 117 | 2095 | 1 | 120 | 335 | 2315 | 33 | 152 |
| F02.PB36457 | F02.PB38145 | 216 | 3093 | 15 | 221 | 759 | 3636 | 38 | 244 |
| F02.PB34128 | F02.PB47900 | 211 | 2751 | 1 | 215 | 1217 | 3757 | 15 | 224 |
| F02.PB46122 | F02.PB40355 | 1 | 1861 | 1861 | 2647 | 1 | 1861 | 2148 | 2933 |
| F02.PB47574 | F02.PB39542 | 151 | 3089 | 1 | 156 | 600 | 3544 | 336 | 492 |
| F02.PB47867 | F02.PB36060 | 105 | 1920 | 1921 | 2968 | 1 | 1816 | 2050 | 3084 |
| F02.PB29937 | F02.PB32045 | 1 | 1477 | 1479 | 2184 | 1 | 1477 | 1606 | 2313 |
| F02.PB29351 | F02.PB41130 | 1 | 1711 | 1711 | 2115 | 227 | 1939 | 2073 | 2478 |
| F02.PB35270 | F02.PB47533 | 27 | 2708 | 2706 | 3092 | 4 | 2667 | 2906 | 3292 |
| F02.PB37524 | F02.PB35887 | 131 | 3151 | 1 | 134 | 279 | 3298 | 5 | 141 |
| F02.PB23235 | F02.PB32699 | 320 | 2113 | 9 | 322 | 449 | 2242 | 1 | 314 |
| F02.PB28149 | F02.PB46134 | 1 | 1568 | 1565 | 2499 | 2 | 1569 | 1945 | 2875 |
| F02.PB34880 | F02.PB40702 | 1361 | 3248 | 1 | 1363 | 1494 | 3364 | 1 | 1376 |
| F02.PB14084 | F02.PB45832 | 183 | 996 | 1 | 183 | 1239 | 2051 | 858 | 1040 |
| F02.PB5421 | F02.PB8219 | 385 | 1025 | 40 | 386 | 539 | 1179 | 40 | 386 |
| F02.PB17690 | F02.PB33449 | 504 | 1877 | 54 | 507 | 1016 | 2391 | 22 | 472 |
| F02.PB31578 | F02.PB26327 | 204 | 2199 | 1 | 204 | 525 | 2519 | 124 | 328 |
| F02.PB17079 | F02.PB44236 | 419 | 1526 | 9 | 419 | 907 | 2014 | 1 | 411 |
| F02.PB39727 | F02.PB37212 | 258 | 3110 | 1 | 261 | 540 | 3413 | 158 | 418 |
| F02.PB43796 | F02.PB36415 | 1 | 1520 | 1517 | 1866 | 1982 | 3504 | 3625 | 3974 |
| F02.PB33984 | F02.PB26366 | 110 | 1968 | 1966 | 2599 | 1 | 1859 | 1961 | 2594 |
| F02.PB33646 | F02.PB38514 | 1 | 1380 | 1381 | 2371 | 469 | 1846 | 2206 | 3196 |
| F02.PB38469 | F02.PB40560 | 215 | 3096 | 14 | 220 | 808 | 3690 | 87 | 293 |
| F02.PB33610 | F02.PB40726 | 129 | 2229 | 2226 | 2731 | 7 | 2107 | 2570 | 3076 |
| F02.PB42051 | F02.PB15762 | 298 | 1072 | 51 | 299 | 491 | 1265 | 42 | 290 |
| F02.PB29196 | F02.PB28945 | 1 | 1295 | 1295 | 2198 | 38 | 1332 | 1456 | 2362 |
| F02.PB33063 | F02.PB31239 | 1 | 1178 | 1179 | 2051 | 1 | 1178 | 1284 | 2156 |
| F02.PB45927 | F02.PB29484 | 587 | 2076 | 6 | 587 | 766 | 2255 | 83 | 661 |
| F02.PB8171 | F02.PB45185 | 290 | 1488 | 9 | 291 | 813 | 1991 | 10 | 291 |
| F02.PB34803 | F02.PB38510 | 15 | 2601 | 2598 | 3123 | 1 | 2589 | 2735 | 3260 |
| F02.PB36457 | F02.PB36682 | 216 | 3093 | 15 | 221 | 807 | 3683 | 38 | 244 |
| F02.PB21340 | F02.PB27893 | 330 | 1763 | 40 | 332 | 676 | 2111 | 4 | 296 |
| F02.PB36457 | F02.PB41364 | 216 | 3093 | 15 | 221 | 841 | 3718 | 112 | 326 |
| F02.PB38125 | F02.PB37940 | 18 | 2259 | 2260 | 2933 | 13 | 2249 | 2485 | 3158 |
| F02.PB20278 | F02.PB29051 | 198 | 1046 | 26 | 201 | 801 | 1649 | 26 | 201 |
| F02.PB31736 | F02.PB45044 | 776 | 2385 | 90 | 778 | 1117 | 2726 | 22 | 710 |
| F02.PB28686 | F02.PB31977 | 256 | 2715 | 1 | 255 | 436 | 2896 | 2 | 259 |
| F02.PB35953 | F02.PB36394 | 1 | 3332 | 3331 | 3562 | 3 | 3341 | 3559 | 3788 |
| F02.PB48089 | F02.PB40238 | 1 | 2179 | 2179 | 3124 | 36 | 2214 | 2340 | 3285 |
| F02.PB43514 | F02.PB27562 | 497 | 1964 | 71 | 498 | 1101 | 2571 | 1 | 435 |
| F02.PB10913 | F02.PB22146 | 140 | 1696 | 1 | 143 | 316 | 1873 | 1 | 149 |
| F02.PB33235 | F02.PB32182 | 1 | 1775 | 1772 | 2135 | 17 | 1791 | 2085 | 2449 |
| F02.PB27102 | F02.PB33157 | 205 | 2261 | 1 | 206 | 347 | 2412 | 2 | 204 |
| F02.PB39578 | F02.PB35489 | 1928 | 119 | 231 | 1928 | 292 | 2114 | 2110 | 3821 |
| F02.PB26652 | F02.PB27911 | 14 | 1858 | 1856 | 2561 | 1 | 1848 | 1996 | 2701 |
| F02.PB23054 | F02.PB46037 | 418 | 2318 | 5 | 413 | 909 | 2816 | 1 | 409 |
| F02.PB45836 | F02.PB25587 | 247 | 2480 | 1 | 246 | 407 | 2641 | 60 | 303 |
| F02.PB21635 | F02.PB32612 | 223 | 1913 | 43 | 228 | 995 | 2682 | 30 | 214 |
| F02.PB21491 | F02.PB17554 | 147 | 1790 | 1 | 149 | 265 | 1913 | 1 | 149 |
| F02.PB31894 | F02.PB36253 | 17 | 1716 | 1714 | 2861 | 1 | 1702 | 2086 | 3233 |
| F02.PB45635 | F02.PB40934 | 218 | 2920 | 1 | 223 | 498 | 3222 | 24 | 247 |
| F02.PB46062 | F02.PB24307 | 1 | 1326 | 1323 | 2051 | 2 | 1320 | 1444 | 2172 |
| F02.PB34803 | F02.PB48518 | 17 | 1964 | 1961 | 2999 | 4 | 1951 | 2307 | 3325 |
| F02.PB20734 | F02.PB44647 | 147 | 1972 | 1 | 146 | 294 | 2119 | 27 | 172 |
| F02.PB21192 | F02.PB27418 | 148 | 2004 | 1 | 152 | 340 | 2200 | 16 | 167 |
| F02.PB38191 | F02.PB40565 | 1 | 1988 | 1988 | 3289 | 1737 | 3726 | 2533 | 3833 |
| F02.PB25163 | F02.PB45806 | 1 | 1305 | 1305 | 2568 | 36 | 1341 | 1645 | 2908 |
| F02.PB32544 | F02.PB40291 | 15 | 2166 | 2164 | 2563 | 39 | 2184 | 2644 | 3043 |
| F02.PB18989 | F02.PB32005 | 542 | 1961 | 74 | 537 | 1197 | 2612 | 1 | 464 |
| F02.PB21147 | F02.PB29033 | 289 | 1933 | 36 | 291 | 398 | 2047 | 1 | 255 |
| F02.PB21316 | F02.PB30659 | 140 | 1690 | 1 | 141 | 496 | 2073 | 124 | 264 |
| F02.PB23441 | F02.PB34316 | 1 | 1655 | 1654 | 2379 | 1 | 1655 | 2058 | 2783 |
| F02.PB23645 | F02.PB29614 | 114 | 2301 | 1 | 115 | 372 | 2559 | 1 | 115 |
| F02.PB34695 | F02.PB25092 | 480 | 2375 | 53 | 480 | 658 | 2553 | 29 | 460 |
| F02.PB17129 | F02.PB45712 | 143 | 1436 | 6 | 144 | 758 | 2051 | 1 | 139 |
| F02.PB37094 | F02.PB38821 | 1496 | 2954 | 14 | 1497 | 1619 | 3077 | 20 | 1504 |
| F02.PB44437 | F02.PB25381 | 406 | 2022 | 44 | 406 | 507 | 2124 | 1 | 363 |
| F02.PB27825 | F02.PB22827 | 1 | 1886 | 1884 | 2092 | 77 | 1948 | 2145 | 2350 |
| F02.PB41025 | F02.PB40048 | 20 | 2574 | 2572 | 3103 | 18 | 2584 | 2713 | 3241 |
| F02.PB33087 | F02.PB40074 | 1 | 2602 | 2601 | 2833 | 314 | 2915 | 3034 | 3264 |
| F02.PB37247 | F02.PB41534 | 1 | 3015 | 3015 | 3490 | 13 | 3027 | 3231 | 3701 |
| F02.PB30401 | F02.PB27434 | 263 | 2266 | 35 | 264 | 343 | 2347 | 1 | 231 |
| F02.PB37789 | F02.PB35890 | 153 | 3022 | 1 | 157 | 268 | 3139 | 12 | 168 |
| F02.PB27825 | F02.PB31914 | 1 | 1886 | 1884 | 2090 | 65 | 1950 | 2147 | 2351 |
| F02.PB41291 | F02.PB39046 | 742 | 3304 | 83 | 744 | 1102 | 3668 | 2 | 667 |
| F02.PB39662 | F02.PB39723 | 1386 | 3656 | 1 | 1386 | 1554 | 3822 | 68 | 1452 |
| F02.PB38391 | F02.PB38403 | 2 | 2577 | 2576 | 3079 | 1 | 2575 | 2675 | 3180 |
| F02.PB27077 | F02.PB29659 | 1 | 1390 | 1387 | 2083 | 1 | 1391 | 1491 | 2183 |
| F02.PB33375 | F02.PB37900 | 1054 | 2405 | 1 | 1056 | 1762 | 3117 | 602 | 1657 |
| F02.PB16259 | F02.PB10295 | 521 | 1138 | 6 | 524 | 856 | 1474 | 1 | 513 |
| F02.PB47773 | F02.PB47384 | 1 | 2287 | 2284 | 3125 | 276 | 2562 | 2692 | 3534 |
| F02.PB37773 | F02.PB40353 | 1 | 3152 | 3149 | 3467 | 6 | 3158 | 3418 | 3738 |
| F02.PB32203 | F02.PB25009 | 482 | 2024 | 6 | 478 | 623 | 2156 | 25 | 496 |
| F02.PB37681 | F02.PB35769 | 1 | 1678 | 1676 | 3050 | 1 | 1678 | 1799 | 3171 |
| F02.PB25602 | F02.PB22937 | 142 | 2443 | 1 | 144 | 254 | 2551 | 1 | 143 |
| F02.PB44160 | F02.PB23839 | 499 | 2409 | 83 | 499 | 835 | 2745 | 168 | 584 |
| F02.PB25930 | F02.PB38600 | 239 | 2492 | 1 | 241 | 842 | 3091 | 1 | 240 |
| F02.PB46246 | F02.PB37183 | 1 | 2389 | 2388 | 2918 | 302 | 2691 | 2908 | 3439 |
| F02.PB17476 | F02.PB32683 | 542 | 1490 | 57 | 545 | 1665 | 2613 | 6 | 494 |
| F02.PB24038 | F02.PB47790 | 1 | 1560 | 1560 | 2711 | 61 | 1613 | 1881 | 3033 |
| F02.PB17280 | F02.PB11140 | 1 | 1178 | 1175 | 1349 | 1 | 1178 | 1304 | 1477 |
| F02.PB32213 | F02.PB39852 | 308 | 2568 | 31 | 308 | 950 | 3208 | 552 | 829 |
| F02.PB32542 | F02.PB30998 | 1 | 1902 | 1899 | 2084 | 313 | 2214 | 2335 | 2519 |
| F02.PB46941 | F02.PB41511 | 1 | 2786 | 2787 | 3309 | 2 | 2787 | 3287 | 3804 |
| F02.PB21846 | F02.PB25927 | 1 | 1372 | 1370 | 1899 | 1 | 1354 | 1562 | 2091 |
| F02.PB32013 | F02.PB41153 | 153 | 2089 | 1 | 158 | 1646 | 3584 | 46 | 203 |
| F02.PB26597 | F02.PB38625 | 1103 | 2720 | 1 | 1106 | 1441 | 3060 | 1 | 1107 |
| F02.PB31001 | F02.PB37915 | 1 | 1287 | 1283 | 2280 | 572 | 1859 | 2187 | 3184 |
| F02.PB44744 | F02.PB40590 | 1 | 1864 | 1867 | 2464 | 23 | 1886 | 2645 | 3242 |
| F02.PB45329 | F02.PB28640 | 10 | 1318 | 1313 | 2173 | 1 | 1309 | 1409 | 2269 |
| F02.PB7239 | F02.PB39100 | 1 | 1300 | 1300 | 1523 | 1694 | 2993 | 3095 | 3318 |
| F02.PB48398 | F02.PB48303 | 20 | 2810 | 2810 | 3025 | 36 | 2826 | 2931 | 3146 |
| F02.PB47186 | F02.PB47569 | 1385 | 3044 | 134 | 1387 | 1822 | 3481 | 441 | 1694 |
| F02.PB34360 | F02.PB48418 | 136 | 2637 | 1 | 136 | 639 | 3140 | 176 | 310 |
| F02.PB31127 | F02.PB26930 | 105 | 2064 | 1 | 107 | 410 | 2377 | 59 | 165 |
| F02.PB40025 | F02.PB39447 | 1 | 2142 | 2142 | 3553 | 5 | 2156 | 2310 | 3722 |
| F02.PB43704 | F02.PB30345 | 1 | 1241 | 1239 | 1913 | 40 | 1287 | 1423 | 2099 |
| F02.PB33571 | F02.PB39710 | 1 | 1602 | 1601 | 2308 | 493 | 2094 | 2201 | 2908 |
| F02.PB45002 | F02.PB34164 | 1 | 1982 | 1980 | 2352 | 461 | 2441 | 2603 | 2975 |
| F02.PB46310 | F02.PB38364 | 1155 | 2865 | 1 | 1156 | 1457 | 3166 | 12 | 1171 |
| F02.PB25404 | F02.PB26615 | 1 | 1157 | 1156 | 2024 | 68 | 1223 | 1325 | 2190 |
| F02.PB18489 | F02.PB26074 | 153 | 1561 | 21 | 157 | 615 | 2023 | 1 | 137 |
| F02.PB29709 | F02.PB44918 | 1 | 2196 | 2195 | 2441 | 1 | 2193 | 2367 | 2624 |
| F02.PB22141 | F02.PB30968 | 1 | 1073 | 1074 | 1930 | 1 | 1088 | 1422 | 2283 |
| F02.PB47568 | F02.PB37476 | 21 | 2517 | 2512 | 3224 | 19 | 2515 | 2760 | 3473 |
| F02.PB20847 | F02.PB30375 | 130 | 1995 | 1 | 132 | 399 | 2264 | 28 | 160 |
| F02.PB33036 | F02.PB25183 | 17 | 1917 | 1913 | 2207 | 43 | 1951 | 2078 | 2369 |
| F02.PB23317 | F02.PB29063 | 1011 | 2210 | 1 | 1014 | 1128 | 2327 | 12 | 1025 |
| F02.PB32213 | F02.PB47283 | 308 | 2545 | 31 | 308 | 905 | 3142 | 519 | 796 |
| F02.PB26074 | F02.PB30581 | 1 | 1646 | 1643 | 2017 | 74 | 1719 | 1999 | 2373 |
| F02.PB42717 | F02.PB11318 | 192 | 1284 | 23 | 191 | 271 | 1363 | 1 | 169 |
| F02.PB33688 | F02.PB24126 | 101 | 2261 | 1 | 100 | 251 | 2412 | 5 | 104 |
| F02.PB39636 | F02.PB41378 | 272 | 3047 | 1 | 274 | 489 | 3266 | 37 | 310 |
| F02.PB11832 | F02.PB44613 | 1 | 1056 | 1055 | 1399 | 5 | 1061 | 1762 | 2106 |
| F02.PB38289 | F02.PB36077 | 1 | 2651 | 2650 | 3046 | 79 | 2726 | 2836 | 3234 |
| F02.PB40522 | F02.PB39517 | 1192 | 3661 | 10 | 1192 | 1301 | 3769 | 2 | 1182 |
| F02.PB41333 | F02.PB36804 | 1594 | 3813 | 1 | 1597 | 1791 | 4011 | 19 | 1617 |
| F02.PB47211 | F02.PB41039 | 1 | 1739 | 1740 | 3016 | 1760 | 3498 | 2420 | 3696 |
| F02.PB23975 | F02.PB44165 | 129 | 2319 | 1 | 129 | 296 | 2486 | 3 | 131 |
| F02.PB23695 | F02.PB30851 | 138 | 2037 | 1 | 138 | 438 | 2337 | 2 | 139 |
| F02.PB41154 | F02.PB39084 | 1 | 2931 | 2927 | 3347 | 67 | 2998 | 3142 | 3562 |
| F02.PB19054 | F02.PB6373 | 288 | 1017 | 29 | 290 | 503 | 1233 | 26 | 287 |
| F02.PB19355 | F02.PB15412 | 285 | 997 | 1 | 282 | 453 | 1156 | 1 | 282 |
| F02.PB30524 | F02.PB46114 | 1 | 1190 | 1195 | 2083 | 369 | 1556 | 1717 | 2604 |
| F02.PB29632 | F02.PB47228 | 1 | 2468 | 2467 | 2672 | 1 | 2472 | 2887 | 3092 |
| F02.PB6082 | F02.PB8618 | 188 | 1157 | 45 | 189 | 392 | 1361 | 1 | 145 |
| F02.PB37876 | F02.PB36800 | 1018 | 3378 | 1 | 1018 | 1249 | 3599 | 1 | 1018 |
| F02.PB34045 | F02.PB39490 | 1 | 1482 | 1478 | 2475 | 322 | 1798 | 2125 | 3122 |
| F02.PB21880 | F02.PB23728 | 1 | 1652 | 1653 | 1946 | 73 | 1723 | 1844 | 2139 |
| F02.PB25039 | F02.PB31509 | 137 | 2470 | 1 | 137 | 314 | 2653 | 75 | 210 |
| F02.PB38469 | F02.PB38145 | 215 | 3181 | 14 | 220 | 759 | 3725 | 38 | 244 |
| F02.PB38191 | F02.PB36673 | 1 | 1988 | 1988 | 3309 | 1734 | 3723 | 2530 | 3850 |
| F02.PB22738 | F02.PB45170 | 1 | 1440 | 1440 | 2362 | 1 | 1440 | 1549 | 2470 |
| F02.PB29432 | F02.PB45349 | 1 | 1662 | 1662 | 2250 | 69 | 1735 | 1878 | 2466 |
| F02.PB35307 | F02.PB36345 | 405 | 3698 | 43 | 407 | 746 | 4042 | 1 | 361 |
| F02.PB40838 | F02.PB36637 | 1388 | 3082 | 1 | 1387 | 1794 | 3488 | 1 | 1387 |
| F02.PB35124 | F02.PB39920 | 13 | 3436 | 3437 | 3781 | 1 | 3424 | 3555 | 3899 |
| F02.PB30390 | F02.PB40669 | 11 | 1820 | 1822 | 2629 | 299 | 2112 | 2239 | 3049 |
| F02.PB37741 | F02.PB48626 | 1 | 1825 | 1826 | 3081 | 2 | 1827 | 1932 | 3172 |
| F02.PB27453 | F02.PB36055 | 1 | 2006 | 2005 | 2976 | 1 | 2008 | 2254 | 3258 |
| F02.PB36235 | F02.PB37907 | 106 | 3235 | 1 | 106 | 223 | 3349 | 1 | 108 |
| F02.PB39693 | F02.PB47665 | 1155 | 3231 | 1 | 1154 | 1288 | 3383 | 4 | 1156 |
| F02.PB18836 | F02.PB24534 | 165 | 1783 | 16 | 164 | 481 | 2099 | 1 | 149 |
| F02.PB44754 | F02.PB38335 | 131 | 2506 | 1 | 130 | 630 | 3005 | 43 | 172 |
| F02.PB23924 | F02.PB46179 | 1 | 1412 | 1413 | 2646 | 37 | 1448 | 1726 | 2959 |
| F02.PB26739 | F02.PB38767 | 1 | 1492 | 1492 | 2589 | 1 | 1496 | 2080 | 3179 |
| F02.PB47952 | F02.PB38634 | 1 | 1780 | 1779 | 3056 | 10 | 1788 | 1910 | 3187 |
| F02.PB28642 | F02.PB23447 | 1 | 1102 | 1099 | 2006 | 5 | 1107 | 1233 | 2142 |
| F02.PB28038 | F02.PB30054 | 1068 | 2240 | 1 | 1072 | 1246 | 2417 | 2 | 1084 |
| F02.PB47967 | F02.PB35145 | 1 | 3057 | 3057 | 3282 | 9 | 3067 | 3333 | 3558 |
| F02.PB32145 | F02.PB34572 | 134 | 2083 | 1 | 135 | 796 | 2745 | 4 | 138 |
| F02.PB35838 | F02.PB36231 | 1402 | 3209 | 1 | 1404 | 1587 | 3392 | 4 | 1407 |
| F02.PB23118 | F02.PB38681 | 167 | 2105 | 1 | 168 | 1168 | 3106 | 1 | 168 |
| F02.PB31001 | F02.PB38514 | 1 | 1287 | 1283 | 2278 | 585 | 1873 | 2201 | 3196 |
| F02.PB40559 | F02.PB39639 | 1574 | 3300 | 103 | 1575 | 1680 | 3407 | 1 | 1476 |
| F02.PB29351 | F02.PB38313 | 1 | 1711 | 1711 | 2115 | 369 | 2069 | 2202 | 2603 |
| F02.PB46100 | F02.PB23130 | 1 | 1595 | 1590 | 2203 | 101 | 1695 | 2011 | 2624 |
| F02.PB45282 | F02.PB26833 | 407 | 2009 | 5 | 409 | 893 | 2496 | 1 | 405 |
| F02.PB19578 | F02.PB28778 | 1 | 1503 | 1504 | 1862 | 1 | 1504 | 1669 | 2027 |
| F02.PB43302 | F02.PB25906 | 390 | 1309 | 4 | 393 | 1623 | 2542 | 1070 | 1460 |
| F02.PB33646 | F02.PB39463 | 1 | 1380 | 1381 | 2361 | 578 | 1957 | 2312 | 3292 |
| F02.PB40544 | F02.PB39319 | 102 | 2137 | 2136 | 3286 | 1 | 2040 | 2939 | 4092 |
| F02.PB33177 | F02.PB33629 | 1 | 1262 | 1262 | 2133 | 1 | 1261 | 1377 | 2250 |
| F02.PB37218 | F02.PB39763 | 260 | 3097 | 1 | 261 | 490 | 3361 | 63 | 323 |
| F02.PB40465 | F02.PB36166 | 151 | 3756 | 1 | 150 | 348 | 3951 | 93 | 242 |
| F02.PB33290 | F02.PB45079 | 317 | 2245 | 71 | 318 | 512 | 2441 | 1 | 248 |
| F02.PB45927 | F02.PB24426 | 587 | 2024 | 6 | 587 | 768 | 2205 | 83 | 664 |
| F02.PB15456 | F02.PB31357 | 1 | 1084 | 1085 | 1489 | 12 | 1093 | 2164 | 2568 |
| F02.PB23170 | F02.PB23179 | 1120 | 2226 | 1 | 1120 | 1230 | 2336 | 1 | 1120 |
| F02.PB41472 | F02.PB36655 | 116 | 2079 | 2082 | 3212 | 21 | 1984 | 2098 | 3228 |
| F02.PB19162 | F02.PB31164 | 285 | 1576 | 36 | 284 | 738 | 2029 | 20 | 267 |
| F02.PB6308 | F02.PB25319 | 147 | 1545 | 1 | 147 | 652 | 2049 | 304 | 449 |
| F02.PB37702 | F02.PB38653 | 1 | 1716 | 1713 | 3051 | 2 | 1707 | 1899 | 3237 |
| F02.PB24308 | F02.PB45826 | 1 | 2558 | 2559 | 2781 | 6 | 2563 | 2669 | 2891 |
| F02.PB12630 | F02.PB26074 | 192 | 1615 | 71 | 195 | 593 | 2016 | 1 | 125 |
| F02.PB23569 | F02.PB47303 | 635 | 2394 | 82 | 638 | 960 | 2719 | 161 | 717 |
| F02.PB13075 | F02.PB30423 | 200 | 1612 | 6 | 199 | 656 | 2065 | 2 | 198 |
| F02.PB38390 | F02.PB48652 | 1 | 1840 | 1837 | 3149 | 1 | 1842 | 2291 | 3591 |
| F02.PB33571 | F02.PB47399 | 1 | 1427 | 1425 | 2308 | 493 | 1919 | 2173 | 3056 |
| F02.PB38469 | F02.PB41433 | 215 | 3091 | 14 | 220 | 835 | 3712 | 114 | 320 |
| F02.PB40548 | F02.PB40755 | 12 | 2747 | 2745 | 3027 | 1 | 2749 | 3017 | 3299 |
| F02.PB35783 | F02.PB40249 | 358 | 3122 | 58 | 357 | 480 | 3244 | 1 | 301 |
| F02.PB42092 | F02.PB19639 | 542 | 1134 | 6 | 545 | 644 | 1238 | 1 | 541 |
| F02.PB33103 | F02.PB34266 | 115 | 2549 | 1 | 113 | 458 | 2892 | 137 | 249 |
| F02.PB10048 | F02.PB38481 | 357 | 1052 | 7 | 359 | 2365 | 3060 | 1 | 353 |
| F02.PB27453 | F02.PB40442 | 2 | 2006 | 2005 | 2976 | 6 | 2015 | 2261 | 3251 |
| F02.PB45784 | F02.PB44935 | 1 | 1213 | 1212 | 2233 | 17 | 1229 | 1371 | 2392 |
| F02.PB16889 | F02.PB28216 | 1 | 1422 | 1420 | 1612 | 8 | 1430 | 1699 | 1891 |
| F02.PB28979 | F02.PB47267 | 1 | 1532 | 1530 | 2473 | 58 | 1589 | 1941 | 2879 |
| F02.PB36398 | F02.PB40862 | 600 | 2994 | 8 | 603 | 878 | 3262 | 120 | 735 |
| F02.PB33561 | F02.PB27866 | 117 | 2091 | 1 | 119 | 727 | 2701 | 4 | 122 |
| F02.PB33834 | F02.PB35928 | 109 | 2790 | 1 | 114 | 865 | 3552 | 18 | 132 |
| F02.PB31915 | F02.PB36088 | 293 | 2848 | 83 | 294 | 579 | 3132 | 23 | 233 |
| F02.PB24889 | F02.PB34248 | 1 | 1408 | 1406 | 2593 | 43 | 1453 | 1725 | 2914 |
| F02.PB38607 | F02.PB36166 | 102 | 3637 | 1 | 105 | 418 | 3951 | 96 | 200 |
| F02.PB32069 | F02.PB36725 | 1147 | 2817 | 1 | 1147 | 1638 | 3307 | 145 | 1295 |
| F02.PB30689 | F02.PB40301 | 1 | 1996 | 1993 | 2760 | 560 | 2557 | 2699 | 3466 |
| F02.PB39080 | F02.PB37689 | 1 | 1750 | 1750 | 3387 | 23 | 1771 | 1878 | 3531 |
| F02.PB32635 | F02.PB32477 | 1 | 1957 | 1955 | 2789 | 6 | 1952 | 2118 | 2927 |
| F02.PB45687 | F02.PB36187 | 1184 | 2850 | 1 | 1186 | 1417 | 3078 | 59 | 1244 |
| F02.PB24745 | F02.PB34053 | 1 | 1334 | 1332 | 2202 | 256 | 1588 | 1922 | 2791 |
| F02.PB34702 | F02.PB47399 | 1 | 1919 | 1917 | 2859 | 1 | 1919 | 2173 | 3115 |
| F02.PB38191 | F02.PB41039 | 1 | 1988 | 1988 | 3308 | 1623 | 3612 | 2419 | 3738 |
| F02.PB39064 | F02.PB36558 | 16 | 2368 | 2366 | 3069 | 1 | 2352 | 2507 | 3210 |
| F02.PB33571 | F02.PB38582 | 1 | 1587 | 1584 | 2308 | 391 | 1977 | 2270 | 2995 |
| F02.PB21371 | F02.PB28787 | 1 | 1416 | 1417 | 1931 | 1 | 1415 | 1665 | 2179 |
| F02.PB16856 | F02.PB44268 | 1 | 1100 | 1100 | 1411 | 206 | 1306 | 2305 | 2618 |
| F02.PB14377 | F02.PB42423 | 203 | 979 | 1 | 208 | 435 | 1211 | 7 | 214 |
| F02.PB47421 | F02.PB35876 | 1086 | 2725 | 1 | 1083 | 2049 | 3691 | 1072 | 2154 |
| F02.PB48423 | F02.PB40124 | 1141 | 3744 | 1 | 1140 | 1245 | 3861 | 1 | 1139 |
| F02.PB42545 | F02.PB31493 | 1 | 1120 | 1120 | 1349 | 678 | 1797 | 1897 | 2135 |
| F02.PB17537 | F02.PB49048 | 269 | 1465 | 1466 | 1076 | 4949 | 6144 | 89 | 478 |
| F02.PB32459 | F02.PB47528 | 1 | 2024 | 2021 | 2290 | 562 | 2585 | 2741 | 3010 |
| F02.PB34904 | F02.PB37583 | 20 | 3132 | 3132 | 3357 | 1 | 3130 | 3234 | 3460 |
| F02.PB8407 | F02.PB25502 | 108 | 1643 | 1 | 109 | 854 | 2391 | 66 | 174 |
| F02.PB35249 | F02.PB41235 | 1 | 2784 | 2784 | 3027 | 57 | 2839 | 2944 | 3188 |
| F02.PB36678 | F02.PB37210 | 1 | 1670 | 1667 | 3033 | 2 | 1690 | 2056 | 3424 |
| F02.PB40477 | F02.PB40645 | 482 | 3688 | 72 | 482 | 520 | 3715 | 1 | 411 |
| F02.PB25596 | F02.PB24369 | 227 | 2040 | 57 | 228 | 479 | 2296 | 1 | 171 |
| F02.PB31363 | F02.PB30026 | 1 | 1446 | 1445 | 2233 | 160 | 1607 | 2041 | 2829 |
| F02.PB31857 | F02.PB33785 | 1 | 1570 | 1567 | 2411 | 1 | 1570 | 2101 | 2949 |
| F02.PB21846 | F02.PB31244 | 1 | 1372 | 1370 | 1899 | 23 | 1397 | 1605 | 2134 |
| F02.PB32825 | F02.PB34064 | 12 | 2105 | 2105 | 2794 | 1 | 2093 | 2254 | 2952 |
